1 Distribution of iridescent colours in hummingbird communities results  
2 from the interplay between selection for camouflage and communication

3 Hugo Gruson<sup>\*a</sup>, Marianne Elias<sup>b</sup>, Juan L. Parra<sup>c</sup>, Christine Andraud<sup>d</sup>, Serge Berthier<sup>e</sup>, Claire  
4 Doutrelant<sup>a</sup>, and Doris Gomez<sup>a,e</sup>

5 <sup>a</sup>CEFE, Univ Montpellier, CNRS, Univ Paul Valéry Montpellier 3, EPHE, IRD, Montpellier, France

6 <sup>b</sup>ISYEB, CNRS, MNHN, Sorbonne Université, EPHE, 45 rue Buffon CP50, Paris, France

7 <sup>c</sup>Grupo de Ecología y Evolución de Vertebrados, Instituto de Biología, Universidad de Antioquia,  
8 Medellín, Colombia

9 <sup>d</sup>CRC, MNHN, Ministère de la Culture et de la Communication, CNRS, Paris, France

10 <sup>e</sup>INSP, Sorbonne Université, CNRS, Paris, France

11 **Abstract**

12 Identification errors between closely related, co-occurring, species may lead to misdirected social interactions such  
13 as costly interbreeding or misdirected aggression. This selects for divergence in traits involved in species identification  
14 among co-occurring species, resulting from character displacement. On the other hand, predation may select for crypsis,  
15 potentially leading co-occurring species that share the same environment and predators to have a similar appearance.  
16 However, few studies have explored how these antagonistic processes influence colour at the community level. Here,  
17 we assess colour clustering and overdispersion in multiple hummingbird communities across Ecuador and identify the  
18 processes at stake by controlling for species phylogenetic relatedness. In hummingbirds, most colours are iridescent  
19 structural colours, defined as colours that change with the illumination or observation angle. Because small variations  
20 in the underlying structures can have dramatic effects on the resulting colours and because iridescent structures can  
21 produce virtually any hue and brightness, we expect iridescent colours to respond finely to selective pressures. Moreover,  
22 we predict that hue angular dependence – a specific aspect of iridescent colours – may be used as an additional channel  
23 for species recognition. In our hummingbird assemblages in Ecuador, we find support for colour overdispersion in  
24 specific body patches at the community level even after controlling for the phylogeny, especially on iridescence-related  
25 traits, suggesting character displacement among co-occurring species. We also find colour clustering at the community  
26 level on dorsal patches, suspected to be involved in camouflage, suggesting that the same cryptic colours are selected  
27 among co-occurring species.

---

\*hugo.gruson@normalesup.org

28 **Keywords:** Reproductive Character Displacement, Agonistic Character Displacement, Camouflage, Structural Colours,  
29 Angle-Dependent Colouration, Community structure, Ecuador

30

31 Colour is a complex communication channel widespread among various taxa and involved in many ecological and  
32 evolutionary processes [1]. It can be described by multiple variables, including hue (colour in its common sense, such as  
33 red, green, blue, etc.) and brightness (average level of grey of a colour, i.e. whether the object is light or dark). Colours  
34 can be produced by two non-mutually exclusive means: pigmentary colours are produced by the selective absorption of  
35 incoming light by pigments, while structural colours are produced by the interaction of incoming light with nanostructures,  
36 causing diffraction, interferences or scattering [2]. Among structural colours, iridescent colours are characterised by a shift  
37 in hue with changes in illumination or observation angle [3]. Iridescent colours are found in many bird families such as  
38 Anatidae (ducks) Phasianidae (fowls), Sturnidae (starlings), or Trochilidae (hummingbirds), and thought to be involved  
39 in numerous adaptations [4]. But evolution of iridescent colours at the community level remains poorly understood. Yet,  
40 they may display evolutionary patterns that differ from non-iridescent colours. Indeed, as opposed to other types of  
41 colours, iridescent colours can produce virtually any hue and are expected to respond more readily and finely to selection,  
42 because large changes of hue can be achieved by small changes in the underlying structures [5]. They can also result in  
43 directional colours only seen at specific angles, as well as highly reflective colours [6].

44 Because colours are involved in many different ecological processes, they are subject to multiple selection pressures,  
45 often with opposite effects [7]. Colour may indeed increase or decrease detectability of an animal depending on the colour  
46 contrast with its surroundings. In particular, colour can reduce predation risk via crypsis or aposematism or serve as a  
47 means of species identification. In this case, two opposite evolutionary forces act on colours: (i) On the one hand, species  
48 living in the same environment are likely experiencing similar selective pressures, such as predation. The environment  
49 is characterised by ambient light and vegetation, which both influence greatly which colours are poorly detectable and  
50 which colours are highly detectable [8, 9]. We thus expect co-occurring species to harbour the same, poorly detectable,  
51 colours as this would decrease the risk of being detected by predators, thereby causing a clustering pattern in colouration  
52 at the community level, all else being equal. This colour clustering can result from convergence between sympatric species  
53 (evolutionary process), from environmental filtering (ecological process), i.e. species sorting locally according to the traits  
54 they harbour, or a mixture of the two (detailed in table 1). (ii) On the other hand, sympatric closely-related species  
55 are more likely to face problems of species recognition, eventually resulting in reproductive interference - a phenomenon  
56 where an individual courts or mates with individuals of another species, producing no offspring or low fertility hybrids,  
57 leading to costly interbreeding [10]. Species misidentification can also lead to misdirected aggression and costly fighting  
58 when individuals compete over resources or territories. Hence, any feature that would enhance species recognition is  
59 expected to be selected for. In this context, closely related species living in sympatry should be under strong selective  
60 pressure to diverge in traits involved in communication, if divergence enhances species recognition. Divergence can result  
61 from a process called character displacement (RCD for reproductive character displacement, ACD for agonistic character  
62 displacement; evolutionary process) [11–13] or from species sorting (ecological process). For ACD, it is worth noting that

63 traits are expected to diverge only in case of moderate ecological competition, whereas they should converge in case of  
64 high competition [13, 14]. Multiple empirical studies have shown character displacement for songs (e.g. Gerhardt [15] in  
65 frogs and Grant and Grant [16] in birds), or olfactory signals [17]. However, fewer studies have looked at divergence in  
66 colour patterns (but see Sætre et al. [18], Naisbit et al. [19], Lukhtanov et al. [20], Martin et al. [21], Doutrelant et al. [22],  
67 and Hemingson et al. [23]). Almost all these studies were at the species level, and at best involved comparison between  
68 closely related species. Many of them also did not use objective spectrometry measurements and instead relied on human  
69 vision, which did not allow them to analyse colours as perceived by the intended receiver, in the case of this study: birds  
70 [24–27] .

71 In birds, it has been showed that colouration is under different selective pressures depending on the body patch  
72 location: dorsal patches, which are exposed to aerial predators, are mainly involved in camouflage while ventral and facial  
73 patches are mainly involved in communication [7, 28]. In this study, we test this hypothesis for iridescent colours at  
74 the community level by looking at phenotypic structure in hummingbird local assemblages across different body parts.  
75 Hummingbirds are an interesting study system to test this hypothesis as various published accounts of sexual displays and  
76 aggressive encounters among hummingbirds have made clear that certain feather patches such as the crown and throat are  
77 consistently used during these displays [29–32]. On the other hand, colours displayed on the dorsal side of hummingbirds  
78 tend to resemble background colours and thus have been suggested to be cryptic [33]. Accordingly, we predict that co-  
79 occurring hummingbird species should display similar hues on dorsal patches, leading to phenotypic clustering of hues  
80 (i.e. co-occurring species are more similar than expected by chance, prediction 1) and different hues on ventral patches,  
81 resulting in a phenotypic overdispersion pattern (i.e. co-occurring species are more dissimilar than expected by chance,  
82 prediction 2). For brightness, we can formulate two alternative predictions: on the one hand, it might evolve in the same  
83 way as hue, also because of reproductive character displacement and selection for camouflage, leading to the same outcome  
84 as for hue (prediction 3, equivalent to predictions 1 and 2 but for brightness). On the other hand, because brightness level  
85 positively correlates with signal conspicuousness, poorly detectable signals have similar brightness, and highly detectable  
86 signals have similar brightness. Hence, we may instead expect that species co-occurring should converge for brightness on  
87 all patches (prediction 3bis) if the same patches are involved in the same ecological process (communication or camouflage).

88 Compared to other types of colouration, iridescent colours might enable species recognition on another dimension in  
89 the sensory space. Two species can have the same hue or brightness at a given angle but can differ at another angle,  
90 via an additional variable we call "hue shift". Because hue shift cannot be seen at long distances, it may allow species  
91 to diverge without interfering with camouflage against predators [4, 34]. Accordingly, we predict overdispersion for hue  
92 shift not only on ventral patches, but also on dorsal patches (prediction 4). However, hue shift is often highly correlated  
93 with hue due to the optics underlying iridescence (Dakin and Montgomerie [35] for example reported  $R^2 \geq 0.95$  for the  
94 correlation between hue and hue shift). We test this correlation with the data from this article and discuss how it may  
95 impact our results.

96 At the community level, we predict that community colour volume (also known as functional richness  $FR_{ic}$  in functional  
97 ecology [36]) and brightness range increase with species richness more than expected in a random species assemblage (null

98 model) because co-occurring species would use different colours (hue or brightness) (prediction 5).

99 Here we test our five predictions by quantifying both iridescent and non-iridescent colours of 189 hummingbird assem-  
100 blages in Ecuador that include 112 species and span a large variety of habitats, and by assessing the phenotypic structure  
101 (clustering, random distribution, overdispersion of colours) and investigate the underlying processes by taking into account  
102 species phylogenetic relatedness within these assemblages. Comparing the uncorrected and the phylogenetically-corrected  
103 phenotypic structure of hummingbird communities will allow us to identify which mechanisms (character displacement,  
104 species sorting with mutual exclusion of similar species, environmental filtering; as detailed in table 1) underlie the com-  
105 munity structure of iridescent colours in hummingbirds.

## 106 **Materials and methods**

107 All scripts and data used to produce the results and figures from this article are available at [https://doi.org/10.5281/](https://doi.org/10.5281/zenodo.3355444)  
108 [zenodo.3355444](https://doi.org/10.5281/zenodo.3355444)

### 109 **Community data**

110 Hummingbirds are particularly suited as a study system to explore the possible effect of reproductive character displace-  
111 ment on iridescent colours because (i) they display a large variety of hues [37] and all species harbour some iridescent  
112 patches, many of which have a very strong angular dependence, rapidly shifting from e.g. pink to green or black [38,  
113 39] (but note that many hummingbirds species also have non-iridescent, pigmentary, patches), (ii) they belong to a very  
114 speciose family whose phylogeny is well established and readily available [40, 41], (iii) they live only in the Americas,  
115 especially in the tropics where numerous species can coexist locally [37] (iv) there is an extensive documentation of hy-  
116 bridisation between co-occurring species (see for example [42, 43] for our region of interest), which creates the perfect  
117 opportunity to study reproductive interference and (v) almost all species are available in museum collections and their  
118 colour can be objectively measured using spectrometric measurements [44].

119 Presence/absence data for hummingbird assemblages at 189 sites in Ecuador (see map in fig. S3) were compiled  
120 from data in peer-reviewed papers and reports from environmental organisations [45]. These sites cover a large variety  
121 of elevation ranges (fig. S3) and habitats [45, 46]. This dataset was previously thoroughly reviewed by comparing the  
122 observations with the known elevational and geographical ranges of each species [46] and includes observations of 112 of  
123 the 132 hummingbirds species found in Ecuador [47].

### 124 **Colour measurements and analyses**

125 For each one of the 112 species, we borrowed one adult male in good condition from either the Museum National d’Histoire  
126 Naturelle (MNHN) in Paris or the Musée des Confluences, in Lyon (full list in Online Supplementary Information). We  
127 ensured that the specimen colouration was representative of the other specimens available in the collections to the human  
128 eye. When multiple subspecies were living in the area where presence was recorded, we randomly picked one of them. We

129 consistently took spectral reflectance measurements on the 8 following patches (described in fig. S1): crown, back, rump,  
130 tail, throat, breast, belly, wing. We also made additional measurements on patches that visually differed in colouration  
131 from these 8 main ones, as in Gomez and Théry [7] and Doutrelant et al. [22].

132 We measured reflectance using a setup similar to Meadows et al. [48], relying on the use of two separate optical fibres.  
133 Light was conducted from an Oceanoptics DH-2000 lamp emitting over the 300-700 nm range of wavelengths to which  
134 birds are sensitive [49] to the sample through an illuminating FC-UV200-2-1.5 x 100 optical fibre (named illumination  
135 fibre). Light reflected by the sample was then collected by a second identical optical fibre (named collection fibre) and  
136 conducted toward an Oceanoptics USB4000 spectrophotometer (used with the SpectraSuite 2.0.162 software). This setup  
137 allows for a precise independent rotation of the illumination and the collection fibres, necessary for the measurements of  
138 iridescent colours [6]. For more details about the measurement conditions as recommended in White et al. [50], see the  
139 supplementary materials (ESM).

140 For every patch, we recorded a first reflectance spectrum at the position of the fibres which maximised total reflectance.  
141 To measure hue angle dependency (iridescence), we then moved both fibres 10° away from the previous position and  
142 recorded a second spectrum, as in Meadows et al. [51]. More recent measurement methods revealed that it would be more  
143 accurate to keep the angular span between the illumination and collection fibres constant [52]. We however confirmed  
144 that this did not impact our results by running our analyses once with all data and once with only data at a given angular  
145 span (which represented 94% of the total data). All measurements were performed in a dark room with temperature  
146 control. Recorded spectra were normalised by an Avantes WS-1 white standard and a measurement with the lamp shut  
147 down (dark reference) and integration times were determined for each sample as to maximise the intensity of the signal  
148 without saturating the spectrometer.

149 Final values were averaged over 5 consecutive measurements and spectra were smoothed using a loess algorithm and  
150 interpolated every 1 nm and negative values were set to zero using the R package `pavo` [53].

151 We analysed spectra using Endler and Mielke [54] model with relative quantum catches  $Q_i$  (without Fechner's law).  
152 All birds are tetrachromats and can see light with wavelengths from 300 to 700 nm, which includes ultra-violet light (UV)  
153 [55]. But different bird species vary in their sensitivity [56]: some are UV-sensitive (UVS) while others are violet-sensitive  
154 (VS). Literature on colour vision in hummingbirds suggests that both types are found within the family (see Chen and  
155 Goldsmith [49] and Herrera et al. [57] for UVS species and Ödeen and Håstad [58] for VS species). Because we did not  
156 have enough information to compute ancestral states and vision type for all species in our study and because it was  
157 found to have little influence in previous studies [7, 28], we ran our analyses as if all species were VS, using the spectral  
158 sensitivities of a typical VS bird, *Puffinus pacificus* [59], whose photoreceptor absorbances match closely those reported for  
159 hummingbirds [58]. We used different illuminants defined in Endler [8], depending on the habitat of the species described  
160 in Stotz et al. [60] (detailed in SI): "large gaps" illumination was used for species living in the canopy while "forest shade"  
161 was used for species living in the understory. Hue was a tridimensional variable defined by the position ( $x$ ,  $y$  and  $z$ ) of the  
162 reflectance spectrum in the tetrahedron representing bird colour vision space [54] and brightness was defined as in Endler  
163 and Mielke [54] (perceived intensity of colour, also sometimes referred to as luminance). We ensured that all indices were

164 repeatable (table S1) by measuring twice the same individual and patch on 20 patches and computing the intra-class  
165 coefficient (ICC) with the rptR R package [61]. We add another variable to describe iridescence: hue shift, defined as  
166 the difference between hue at maximum reflectance and hue at  $10^\circ$  away from maximum reflectance, in a similar fashion  
167 to Dakin and Montgomerie [35]. Because it is the difference of two tridimensional variables (hue at the position where  
168 reflectance was maximum and hue at  $10^\circ$  away), hue shift is tridimensional as well. Dakin and Montgomerie [35] found a  
169 high correlation between hue and hue shift at the intraspecific level in the peacock *Pavo cristatus*, we also report a high  
170 correlation at the interspecific level in hummingbirds by performing a linear regression in  $\mathbb{R}^3$  between hue and hue shift  
171 ( $R^2 = 0.51$ ,  $F(3; 1372) = 469.7$ ,  $p < 0.0001$ ). New measurement methods have since been developed and propose a new  
172 definition for hue shift which is not correlated to hue but they were not available at the time of this study [52].

173 We analysed the colour volume for each species by measuring the convex hull volume of all colour patches on the  
174 bird, as suggested in Stoddard and Prum [62]. We compared the relationship between the colour volume of a community  
175 and the number of species within this community relative to a null model (prediction 5) obtained by creating random  
176 assemblages from a species pool containing all species from all communities. In other words, actual assemblages are  
177 compared to fictional assemblages with exactly the same number of species but no abiotic or biotic constraints on the  
178 species composition.

179 However, the colour volume does not take into account the patch location on the bird body, raising several concerns.  
180 First, two species could use the same colour but at different places on their body. They would then look different to  
181 an observer but not identified as such in this analysis. Additionally, we expect different evolutionary signals on different  
182 patches, that could even each other out, and blur the outcome at the bird level. For these reasons, we also performed  
183 our analyses separately for each one of the following eight patches: crown, back, rump, tail, throat, breast, belly, wing  
184 (locations shown in fig. S1).

## 185 Trochilidae phylogeny and comparative analyses

186 A distribution of 100 phylogenetic trees of the Trochilidae family was downloaded from birdtree.org [40] to take into  
187 account phylogenetic uncertainty in the comparative analyses [63]. The 112 species included in this study constitute a  
188 fairly even sampling of the hummingbird phylogeny (fig. S2).

189 We used the method developed by Hardy and Senterre [64] and Baraloto et al. [65] to analyse respectively the phyloge-  
190 netic ( $\Pi_{ST}$ ) and phenotypic ( $\tau_{ST}$ ) structures of the hummingbird communities of Ecuador (clustering or overdispersion).  
191 This method relies on computing indices inspired by the Simpson index and the fixation index  $F_{ST}$ , comparing the ob-  
192 served diversity within and between the communities. For phylogeny,  $\Pi_{ST}$  can reveal phylogenetic clustering ( $\Pi_{ST} > 0$ )  
193 or phylogenetic overdispersion ( $\Pi_{ST} < 0$ ) within communities. Likewise, for phenotypic traits,  $\tau_{ST}$  can reveal phenotypic  
194 clustering ( $\tau_{ST} > 0$ ) or phenotypic overdispersion ( $\tau_{ST} < 0$ ) within communities. Statistical significance of overdispersion  
195 or clustering is obtained from comparing the observed value to that obtained from 1000 random communities (created by  
196 drawing from the total species pool, using algorithm 1s from Hardy [66], which keeps the local species richness per site  
197 constant). This approach compares the phenotypic structure to what would be expected by chance.

198 To disentangle the relative effect of ecological (species sorting) and evolutionary mechanisms (selection), we also perform  
199 our analyses by taking into account the phylogenetic relationships between species. If the species in the community are  
200 more clustered or overdispersed than expected given their phylogenetic relationships, this is taken as evidence that the  
201 trait has not evolved in a Brownian fashion (detailed in table 1). To this end, we used the `decouple` function [67], which  
202 returns phylogenetically predicted and residual trait values by performing a linear regression of individual trait values  
203 explained by the phylogeny. We computed the value of  $\tau_{ST}$  on trait values decoupled from the phylogeny. This value is  
204 hereafter denoted  $dc\tau_{ST}$ . Similarly to the classical  $\tau_{ST}$ , the sign of  $dc\tau_{ST}$  indicates phenotypic clustering ( $dc\tau_{ST} > 0$ ) or  
205 overdispersion ( $dc\tau_{ST} < 0$ ) once the effect of the phylogenetic structure of the communities has been decoupled.

|                                                                                                                                                                                                             | $\tau_{ST} < 0$                                                                                                                                                                                                                                                               | $\tau_{ST} = 0$                                                                                                                                                                                                                                                                              | $\tau_{ST} > 0$                                                                                                                                                                                                                                                            |
|-------------------------------------------------------------------------------------------------------------------------------------------------------------------------------------------------------------|-------------------------------------------------------------------------------------------------------------------------------------------------------------------------------------------------------------------------------------------------------------------------------|----------------------------------------------------------------------------------------------------------------------------------------------------------------------------------------------------------------------------------------------------------------------------------------------|----------------------------------------------------------------------------------------------------------------------------------------------------------------------------------------------------------------------------------------------------------------------------|
| $d\tau_{ST} < 0$                                                                                                                                                                                            | <b>Phenotypic overdispersion</b><br>Co-occurring species are less similar than expected by chance because of character displacement.                                                                                                                                          | <b>No community structure</b><br>Co-occurring species are nor more neither less similar than expected by chance despite character displacement because closely related species co-occur more often than expected at random ( <b>phylogenetic clustering; <math>\Pi_{ST} &gt; 0</math></b> ). | <b>Phenotypic clustering</b><br>Co-occurring species are more similar than expected by chance despite character displacement because closely related species co-occur more often than expected at random ( <b>phylogenetic clustering; <math>\Pi_{ST} &gt; 0</math></b> ). |
| <b>Character displacement (divergence):</b> co-occurring species are more dissimilar than expected given their phylogenetic relationships, which means they evolved towards dissimilarity in their colours. |                                                                                                                                                                                                                                                                               |                                                                                                                                                                                                                                                                                              |                                                                                                                                                                                                                                                                            |
| $d\tau_{ST} = 0$                                                                                                                                                                                            | <b>Competitive exclusion:</b> co-occurring species are more dissimilar than expected by chance because distantly-related (and therefore dissimilar) species co-occur more often than expected at random ( <b>phylogenetic overdispersion; <math>\Pi_{ST} &lt; 0</math></b> ). | Co-occurring species are not more similar nor more different than expected by change or than predicted given their phylogenetic relationships.                                                                                                                                               | <b>Environmental filtering:</b> co-occurring species are more similar than expected by chance because closely-related (and therefore similar) species co-occur more often than expected at random ( <b>phylogenetic clustering; <math>\Pi_{ST} &gt; 0</math></b> ).        |
| <b>Brownian trait evolution</b>                                                                                                                                                                             |                                                                                                                                                                                                                                                                               |                                                                                                                                                                                                                                                                                              |                                                                                                                                                                                                                                                                            |
| $d\tau_{ST} > 0$                                                                                                                                                                                            | Co-occurring species are less similar than expected by chance despite evolutionary convergence because distantly-related species co-occur more often than expected at random ( <b>phylogenetic overdispersion; <math>\Pi_{ST} &lt; 0</math></b> ).                            | Co-occurring species are neither more nor less similar than expected by chance despite evolutionary because distantly-related species co-occur more often than expected at random ( <b>phylogenetic overdispersion; <math>\Pi_{ST} &lt; 0</math></b> ).                                      | Co-occurring species are more similar than expected by chance because of evolutionary convergence.                                                                                                                                                                         |
| <b>Evolutionary convergence :</b> co-occurring species are more similar than expected given their phylogenetic relationships, which means they evolved towards similarity in their colours.                 |                                                                                                                                                                                                                                                                               |                                                                                                                                                                                                                                                                                              |                                                                                                                                                                                                                                                                            |

Table 1: Summary of the different evolutionary and ecological scenarios and their results in terms of values of  $\tau_{ST}$  and decoupled  $d\tau_{ST}$ .



Analyses performed on a tree distribution ( $\Pi_{ST}$  and  $dc\tau_{ST}$ ) with  $n$  trees return a distribution of  $n$  statistics values and  $n$  p-values  $p_i$ . We summarised this information by computing the median of the statistics and the overall p-value  $p$  by using Jost's formula [68]:

$$p = k \sum_{i=0}^{n-1} \frac{(-\ln(k))^i}{i!} \quad \text{where } k = \prod_{i=1}^n p_i \quad (1)$$

## Results

We find a strong phylogenetic clustering within communities ( $\Pi_{ST} = 0.062 > 0$ ,  $p < 0.0001$ ), indicating that co-occurring species are more closely related than expected by chance.

### Phenotypic structure of the communities (predictions 1 - 4)

When looking at the bird entire body (when all patches are included simultaneously) by computing the overlap of the colour volumes, we did not find any phenotypic structure.

When the different major patches (crown, back, rump, tail, throat, breast, belly and wing) are examined separately (table 2 and table S2), we find clustering ( $\tau_{ST} > 0$ ) in hue and hue shift on the back, rump, tail, belly and wing. Once we decouple the effect of the shared evolutionary history, we find clustering on the crown and the back ( $dc\tau_{ST} > 0$ ) but overdispersion on the belly for both hue and hue shift ( $dc\tau_{ST} < 0$ ). Hue shift is also overdispersed on the rump and the tail ( $dc\tau_{ST} < 0$ ). There is no phenotypic structure on the throat, breast or wing for hue and hue shift nor on the rump or the tail for hue.

We find no phenotypic structure (neither clustering nor overdispersion) for brightness on any patches before phylogenetic correction. After phylogenetic correction, brightness values for the throat, breast and belly are clustered among co-occurring species ( $dc\tau_{ST} > 0$ ) but show no phenotypic structure for the crown, the back, the wing and the tail.

### Effect of community species richness on colour characteristics (prediction 5)

We found that the brightness range within a community increased in the same way as a null model built from random species assemblages (fig. 1b). For colour volume, we find some outliers with a higher colour volume than expected for community with the same number of species (fig. 1a).

## Discussion

Our findings suggest that colour structure within hummingbird communities likely results from the interplay between two selective pressures, acting in opposite directions: selection by the local environment (e.g. camouflage from predators, leading to phenotypic clustering on dorsal patches, and selection for species recognition, leading to phenotypic overdispersion on ventral and facial patches.

| Variable                 | Phenotypic structure ( $\tau_{ST}$ )                                                | Decoupled phenotypic structure ( $dc\tau_{ST}$ )                                      |
|--------------------------|-------------------------------------------------------------------------------------|---------------------------------------------------------------------------------------|
| Hue                      | 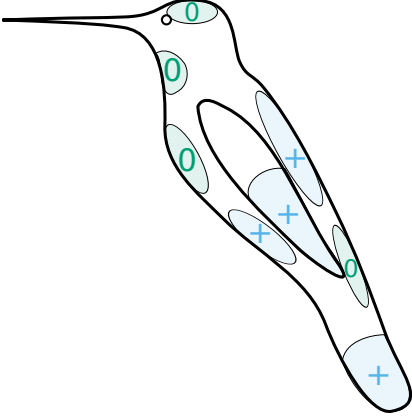   |    |
| Brightness               |   |   |
| Hue shift (=iridescence) |  |  |

Table 2: Phenotypic structure of hummingbird communities for different variables (hue, brightness and hue shift) on the patches studied (crown, back, rump, tail, throat, breast, belly, wing; names and locations illustrated in fig. S1). Hue is a tridimensional variable defined by the reflectance spectrum position  $x$ ,  $y$  and  $z$  in the tetrahedron representing avian colour space. Blue plus signs  $+$  indicate significant phenotypic clustering ( $\tau_{ST}$  or  $dc\tau_{ST} > 0$ ), orange minus signs  $-$  indicate significant phenotypic overdispersion ( $\tau_{ST}$  or  $dc\tau_{ST} < 0$ ), and green zeros  $0$  represent the absence of phenotypic structure. The left column shows the raw phenotypic structure of the community (columns in table 1), which may be influenced by the phylogenetic structure while the right column shows the phenotypic structure of the community, decoupled from all effects caused by the phylogeny (rows in table 1). By comparing the values of  $\tau_{ST}$  and  $dc\tau_{ST}$  for each trait colour variable (hue, brightness and hue shift), we can assume a probable evolutionary scenario for each patches, based on the explanation in table 1. Exact values for the statistics are available in table S2.

## 233 Evidence for different evolutionary scenarios depending on patch location

234 At the entire bird level (i.e. when pooling together all patches), we did not find any phenotypic structure. But as  
235 mentioned earlier, this was expected since different locations on the birds are expected to be under different selection  
236 regimes [7, 28].

237 In accordance with our prediction 5, community colour volume (as estimated by the convex hull of hue and brightness  
238 range within a community) increases slightly faster with the number of species in the community than predicted by a null  
239 model. This suggests that co-occurring species in these communities tend to use more similar colours than expected by  
240 chance. However, this is not the cause for the majority of communities, where co-occurring species do not use more nor  
241 less similar colours than expected by chance. This is further confirmed by the absence of phenotypic structure on the  
242 colour volume and the brightness when the effect of the phylogeny is not decoupled.

243 This could be the consequence of similar selective pressures between the communities we studied, leading colours in  
244 all assemblages to be randomly determined. This is however not very likely because the communities we studied differ a  
245 lot in both their vegetation background and therefore in the pressure for crypsis [45] and in their species composition. A  
246 more likely hypothesis is that co-occurring species tend to use the same colours but not necessarily on the same patches,  
247 which would also explain the absence of phenotypic structure when we pool all patches without taking into account their  
248 location. This is confirmed by our analysis patch by patch, where we find either clustering or overdispersion depending  
249 on the location of the patch.

## 250 Selection for convergence and phenotypic clustering

251 In accordance with our predictions, co-occurring hummingbird species tend to have similar hues on patches more likely  
252 dedicated to camouflage (back, rump, tail, wing; prediction 1) but not on patches more likely used in communication  
253 (crown, throat, breast; prediction 2), as shown in table 2 and table S2. This new result for iridescence colours matches  
254 what has been previously described for non-iridescent colours [7, 28]. The phenotypic clustering observed for hue on the  
255 rump, the tail and the wing vanishes after decoupling the clustering effect due to phylogenetic structure. This means that  
256 phenotypic clustering of hue on the rump, the tail and the wing is not caused by convergent evolution of co-occurring  
257 species but by environmental filtering, leading related, similar-looking species to live in the same area (as explained in  
258 table 1). This is confirmed by the high value of phylogenetic clustering. This sign of phylogenetic clustering completes  
259 the results from Graham et al. [45] on the same dataset. We showed that intra-community species relatedness is high  
260 compared to inter-community species relatedness ( $\Pi_{ST}$ ), while they showed that intra-community species relatedness (Net  
261 Relatedness Index) is higher than expected from random assemblages in 71 % of the cases [45]. This phylogenetic clustering  
262 may be caused by a strong niche conservatism but our study cannot discriminate whether such niche conservatism involves  
263 colour or other ecological traits. However, hummingbirds' costly hovering flight at high elevation due to weaker lift caused  
264 by the decreasing atmospheric pressure [69–71] and high foraging specialisation [72] likely contribute to this pattern.  
265 Alternatively, phylogenetic clustering could also be caused by a very low dispersal ability of hummingbirds, but this  
266 remains quite unlikely as the rare studies on this topic have shown that different hummingbird species display a wide

267 variation in their dispersal ability [73, 74].

268 Contrary to our prediction 2, we also find clustering of hue on the belly before the use of the `decouple` function.  
269 However, the fact that it turns into overdispersion after the use of the `decouple` function, and not simply into a random  
270 phenotypic structure (as opposed to the rump, the tail and the wing mentioned just before), suggests this initial clustering  
271 (right column in table 1) is mainly caused by environmental filtering on another trait but that hue on the belly is still  
272 under selection for divergence (first row in table 1). This other trait may be the colour of another patch or other ecological  
273 traits, as we explained previously.

274 We found a significant clustering of brightness on the throat, breast and belly after controlling for the phylogeny,  
275 indicating that brightness on those patches is more similar than expected given the phylogeny among co-occurring species  
276 (prediction 3bis). This suggests that the same patches have been selected to be involved either in communication or  
277 in camouflage among species living in the same environment. This is seen after controlling for the phylogeny and it  
278 is therefore not caused by the phylogenetic relatedness of co-occurring species. This is not surprising as many studies  
279 showed the paramount importance of the throat in the courtship display of many hummingbird species [29–32, 75] Two  
280 main hypotheses can explain why co-occurring species tend to communicate (or camouflage themselves) using the same  
281 patches: (i) There may be selective pressures for the use of specific patches in camouflage in a given environment (e. g.,  
282 patches that are more exposed to predators' sight). (ii) Convergence in patches used in communication may be selected  
283 because it improves competitor identification in the case of a strong ecological niche overlap (convergence by agonistic  
284 character displacement as shown in Grether et al. [13] and Tobias et al. [76]).

285 All those results suggest a strong effect of the environment in the evolution of colour in agreement with McNaught  
286 and Owens [77] who found that bird plumage colour was due to the light environment and not to reproductive character  
287 displacement in Australian birds. However, we do not find clustering on all patches, which means that the effect of habitat  
288 pressure is somehow limited or counterbalanced by reproductive or agonistic character displacement. On the contrary, for  
289 some patches, we found patterns that are likely the result of character displacement.

## 290 **Character displacement and phenotypic overdispersion**

291 In agreement with our prediction 2, after decoupling the effect of the phylogeny, there is overdispersion of hue on the  
292 belly, likely caused by character displacement (table 1). At a completely different taxonomic scale, focusing on a single  
293 hummingbird genus (*Coeligena*) with 11 species, Parra [33] also found that the belly was always involved in the difference  
294 in hue between subspecies. It was sometimes even the only patch causing those differences, as for example between  
295 *Coeligena torquata fulgidigula* and *Coeligena torquata torquata*. This suggests that the interspecific divergence we found  
296 on the belly at the community level on the whole Trochilidae family can be observed at different geographic and taxonomic  
297 scales, and even between subspecies of the same species.

298 As predicted, we also find more phenotypic overdispersion for hue shift than hue after decoupling the effect of the  
299 phylogeny, for example, on the rump and on the tail (prediction 4). It is possible that hue shift is less sensitive to selection  
300 for convergence because it may vary without disturbing camouflage efficacy. However, we did not find the expected

301 relaxing of clustering on hue shift on patches such as the back. This is likely caused by the fact that hue shift is highly  
302 correlated with hue, as found in this study and in Dakin and Montgomerie [35], who used the same indices to quantify  
303 iridescence. This correlation is due to the optics controlling iridescence, meaning that species that display similar hues  
304 should also display the same hue shift if they use the same underlying multilayer structures. The fact that the correlation  
305 is not perfect and that we nonetheless get different phenotypic patterns for hue and hue shift on some patches suggests  
306 that co-occurring species use different multilayer structures (as recently confirmed by [78]), which can produce different  
307 iridescent effects while displaying the same hue (functional convergence on hue).

308 Against our prediction 2, we did not find phenotypic overdispersion on any of the colour variables on patches such as  
309 the throat or the crown, that are thought to be sexually selected and often used in courtship displays [29, 79]. Several  
310 hypotheses can explain this fact: (i) The overdispersion on some patches (hue on the belly and hue shift on the rump and  
311 tail) is sufficient to enable species recognition. (ii) The current phenotypic structure, which is neither overdispersed nor  
312 clustered, on those patches is sufficient to enable species recognition. Indeed, the absence of phenotypic overdispersion  
313 does not mean that species look the same. It simply means that colour differences between species living in the same  
314 community and species in different communities occur in similar ranges. This difference may be sufficient to relax the  
315 selective pressure towards reproductive character displacement. (iii) The pressure towards overdispersion is balanced by  
316 habitat filtering (for both ventral and dorsal patches), resulting in no apparent phenotypic structure. The latter hypothesis  
317 was also a candidate explanation of the pattern found by Martin et al. [21], where sympatric closely related species are  
318 more divergent than allopatric ones, but only when the range overlap is limited. They suggested that local adaptation  
319 could hinder divergence when species ranges was exactly the same. (iv) Species recognition is achieved by additional means  
320 and divergence occurs on others traits, such as modified feathers [80], song [81, 82] or non-vocal noises [83–85] and size.  
321 Notably, different species of hummingbirds can have very different courtship behaviour: leks for hermits [86, 87], dives  
322 and shuttle displays for bees [31, 84, 88], for instance.

323 Taken together, our results suggest that hummingbird iridescent colours are determined by different evolutionary  
324 mechanisms depending on their location. Within a community, co-occurring hummingbird species tend to display the  
325 same hues on dorsal patches probably because of selective pressures related to the local environment, such as selection  
326 for crypsis by predators, causing phenotypic clustering at the community level. This phenotypic clustering does not seem  
327 to be caused by adaptive convergence on colours but rather by environmental filtering perhaps linked to other ecological  
328 traits such as elevation tolerance or flight ability. In spite of such environmental filtering, character displacement leads  
329 to overdispersion for hue on the belly and hue shift on the rump and the tail. Iridescence may therefore enable species  
330 recognition without affecting camouflage efficacy of birds, by opening up a new dimension in the sensory space: hue shift.

## 331 Acknowledgments

332 This project heavily relied on museum specimens which were made available by the work of collection curators: Patrick  
333 Boussès, Anne Previato, and Jérôme Fuchs (Muséum National d’Histoire Naturelle), Cédric Audibert and Harold Labrique  
334 (Musée des Confluences).

## 335 Conflict of interest disclosure

336 The authors of this preprint declare that they have no financial conflict of interest with the content of this article. Marianne  
337 Elias is part of the managing board of PCIEvolBiol and is one of the PCIEvolBiol recommenders.

## 338 References

- 339 [1] JW Bradbury and SL Vehrencamp. *Principles of Animal Communication*. 2. ed. OCLC: 759797180. Sunderland,  
340 Mass: Sinauer Associates, 2011. 697 pp. ISBN: 978-0-87893-045-6.
- 341 [2] AR Parker. “515 Million Years of Structural Colour”. In: *Journal of Optics A: Pure and Applied Optics* 2.6 (2000),  
342 R15–R28. DOI: 10.1088/1464-4258/2/6/201.
- 343 [3] P Vukusic. “Natural Photonics”. In: *Physics World* 17.2 (2004), p. 35. DOI: 10.1088/2058-7058/17/2/34.
- 344 [4] SM Doucet and MG Meadows. “Iridescence: A Functional Perspective”. In: *Journal of The Royal Society Interface*  
345 6 (Suppl 2 2009), S115–S132. DOI: 10.1098/rsif.2008.0395.focus. pmid: 19336344.
- 346 [5] RO Prum. “Anatomy, Physics, and Evolution of Structural Colors”. In: *Bird Coloration, Volume 1: Mechanisms and*  
347 *Measurements*. Ed. by GE Hill and KJ McGraw. Vol. 1. 2 vols. Bird Coloration. Harvard University Press, 2006,  
348 p. 640. ISBN: 978-0-674-01893-8.
- 349 [6] DC Osorio and AD Ham. “Spectral Reflectance and Directional Properties of Structural Coloration in Bird Plumage”.  
350 In: *Journal of Experimental Biology* 205.14 (2002), pp. 2017–2027. pmid: 12089207.
- 351 [7] D Gomez and M Théry. “Simultaneous Crypsis and Conspicuousness in Color Patterns: Comparative Analysis of  
352 a Neotropical Rainforest Bird Community”. In: *The American Naturalist* 169.s1 (2007), S42–S61. DOI: 10.1086/  
353 510138.
- 354 [8] JA Endler. “The Color of Light in Forests and Its Implications”. In: *Ecological Monographs* 63.1 (1993), pp. 1–27.  
355 DOI: 10.2307/2937121.
- 356 [9] D Gomez and M Théry. “Influence of Ambient Light on the Evolution of Colour Signals: Comparative Analysis of  
357 a Neotropical Rainforest Bird Community”. In: *Ecology Letters* 7.4 (2004), pp. 279–284. DOI: 10.1111/j.1461-  
358 0248.2004.00584.x.
- 359 [10] J Gröning and A Hochkirch. “Reproductive Interference Between Animal Species”. In: *The Quarterly Review of*  
360 *Biology* 83.3 (2008), pp. 257–282. DOI: 10.1086/590510.
- 361 [11] WL Brown and EO Wilson. “Character Displacement”. In: *Systematic Biology* 5.2 (1956), pp. 49–64. DOI: 10.2307/  
362 2411924.
- 363 [12] R Butlin. “Speciation by Reinforcement”. In: *Trends in Ecology & Evolution* 2.1 (1987), pp. 8–13. DOI: 10.1016/  
364 0169-5347(87)90193-5.

- 365 [13] GF Grether, N Losin, CN Anderson, and K Okamoto. “The Role of Interspecific Interference Competition in Char-  
366 acter Displacement and the Evolution of Competitor Recognition”. In: *Biological Reviews* 84.4 (2009), pp. 617–635.  
367 DOI: 10.1111/j.1469-185X.2009.00089.x. pmid: 19681844.
- 368 [14] JA Tobias and N Seddon. “Signal Design and Perception in *Hypocnemis* Antbirds: Evidence for Convergent Evolution  
369 via Social Selection”. In: *Evolution* 63.12 (2009), pp. 3168–3189. DOI: 10.1111/j.1558-5646.2009.00795.x. pmid:  
370 19659594.
- 371 [15] HC Gerhardt. “Reproductive Character Displacement of Female Mate Choice in the Grey Treefrog, *Hyla Chrysoscelis*”.  
372 In: *Animal Behaviour* 47.4 (1994), pp. 959–969. DOI: 10.1006/anbe.1994.1127.
- 373 [16] BR Grant and PR Grant. “Songs of Darwin’s Finches Diverge When a New Species Enters the Community”. In:  
374 *Proceedings of the National Academy of Sciences* 107.47 (2010), pp. 20156–20163. DOI: 10.1073/pnas.1015115107.  
375 pmid: 21048082.
- 376 [17] PMB Bacquet, O Brattström, HL Wang, CE Allen, C Löfstedt, et al. “Selection on Male Sex Pheromone Composition  
377 Contributes to Butterfly Reproductive Isolation”. In: *Proceedings of the Royal Society B: Biological Sciences* 282.1804  
378 (2015), p. 20142734. DOI: 10.1098/rspb.2014.2734. pmid: 25740889.
- 379 [18] GP Sætre, T Moum, S Bureš, M Král, M Adamjan, et al. “A Sexually Selected Character Displacement in Flycatchers  
380 Reinforces Premating Isolation”. In: *Nature* 387.6633 (1997), pp. 589–592. DOI: 10.1038/42451. pmid: 847.
- 381 [19] RE Naisbit, CD Jiggins, and J Mallet. “Disruptive Sexual Selection against Hybrids Contributes to Speciation  
382 between *Heliconius Cydno* and *Heliconius Melpomene*”. In: *Proceedings of the Royal Society of London B: Biological*  
383 *Sciences* 268.1478 (2001), pp. 1849–1854. DOI: 10.1098/rspb.2001.1753. pmid: 11522205.
- 384 [20] VA Lukhtanov, NP Kandul, JB Plotkin, AV Dantchenko, D Haig, et al. “Reinforcement of Pre-Zygotic Isolation  
385 and Karyotype Evolution in *Agrodiaetus* Butterflies”. In: *Nature* 436.7049 (2005), pp. 385–389. DOI: 10.1038/  
386 nature03704.
- 387 [21] PR Martin, R Montgomerie, and SC Loughheed. “Color Patterns of Closely Related Bird Species Are More Divergent  
388 at Intermediate Levels of Breeding-Range Sympatry”. In: *The American Naturalist* 185.4 (2015), pp. 443–451. DOI:  
389 10.1086/680206.
- 390 [22] C Doutrelant, M Paquet, JP Renoult, A Grégoire, PA Crochet, et al. “Worldwide Patterns of Bird Colouration on  
391 Islands”. In: *Ecology Letters* 19.5 (2016), pp. 537–545. DOI: 10.1111/e1e.12588.
- 392 [23] CR Hemingson, PF Cowman, JR Hodge, and DR Bellwood. “Colour Pattern Divergence in Reef Fish Species Is  
393 Rapid and Driven by Both Range Overlap and Symmetry”. In: *Ecology Letters* 22.1 (2019), pp. 190–199. DOI:  
394 10.1111/e1e.13180.
- 395 [24] ATD Bennett, IC Cuthill, and KJ Norris. “Sexual Selection and the Mismeasure of Color”. In: *The American*  
396 *Naturalist* 144.5 (1994), pp. 848–860. DOI: 10.1086/285711.
- 397 [25] IC Cuthill, ATD Bennett, JC Partridge, and EJ Maier. “Plumage Reflectance and the Objective Assessment of Avian  
398 Sexual Dichromatism”. In: *The American Naturalist* 153.2 (1999), pp. 183–200. DOI: 10.1086/303160.

- 399 [26] MD Eaton. “Human Vision Fails to Distinguish Widespread Sexual Dichromatism among Sexually “Monochromatic”  
400 Birds”. In: *Proceedings of the National Academy of Sciences* 102.31 (2005), pp. 10942–10946. DOI: 10.1073/pnas.  
401 0501891102. pmid: 16033870.
- 402 [27] R Montgomerie. “Analyzing Colors”. In: *Bird Coloration, Volume 1: Mechanisms and Measurements*. Ed. by GE Hill  
403 and KJ McGraw. Vol. 1. 2 vols. Bird Coloration. Harvard University Press, 2006, p. 640. ISBN: 978-0-674-01893-8.
- 404 [28] K Delhey. “Revealing The Colourful Side of Birds: Spatial Distribution of Conspicuous Plumage Colours on The  
405 Body of Australian Birds”. In: *bioRxiv* (2019), p. 647727. DOI: 10.1101/647727.
- 406 [29] FG Stiles. “Aggressive and Courtship Displays of the Male Anna’s Hummingbird”. In: *The Condor* 84.2 (1982),  
407 pp. 208–225. DOI: 10.2307/1367674. JSTOR: 1367674.
- 408 [30] RK Simpson and KJ McGraw. “Experimental Trait Mis-Matches Uncover Specificity of Evolutionary Links between  
409 Multiple Signaling Traits and Their Interactions in Hummingbirds”. In: *Evolution* (2018). DOI: 10.1111/evo.13662.
- 410 [31] RK Simpson and KJ McGraw. “Two Ways to Display: Male Hummingbirds Show Different Color-Display Tactics  
411 Based on Sun Orientation”. In: *Behavioral Ecology* 29.3 (2018), pp. 637–648. DOI: 10.1093/beheco/ary016.
- 412 [32] BG Hogan and MC Stoddard. “Synchronization of Speed, Sound and Iridescent Color in a Hummingbird Aerial  
413 Courtship Dive”. In: *Nature Communications* 9.1 (2018), p. 5260. DOI: 10.1038/s41467-018-07562-7.
- 414 [33] JL Parra. “Color Evolution in the Hummingbird Genus *Coeligena*”. In: *Evolution* 64.2 (2010), pp. 324–335. DOI:  
415 10.1111/j.1558-5646.2009.00827.x. pmid: 19703221.
- 416 [34] BD Wilts, K Michielsen, J Kuipers, H De Raedt, and DG Stavenga. “Brilliant Camouflage: Photonic Crystals in the  
417 Diamond Weevil, *Entimus Imperialis*”. In: *Proceedings of the Royal Society B: Biological Sciences* 279.1738 (2012),  
418 pp. 2524–2530. DOI: 10.1098/rspb.2011.2651.
- 419 [35] R Dakin and R Montgomerie. “Eye for an Eyespot: How Iridescent Plumage Ocelli Influence Peacock Mating Success”.  
420 In: *Behavioral Ecology* 24.5 (2013), pp. 1048–1057. DOI: 10.1093/beheco/art045.
- 421 [36] S Villéger, NWH Mason, and D Mouillot. “New Multidimensional Functional Diversity Indices for a Multifaceted  
422 Framework in Functional Ecology”. In: *Ecology* 89.8 (2008), pp. 2290–2301. DOI: 10.1890/07-1206.1.
- 423 [37] J Del Hoyo, A Elliott, J Sargatal, DA Christie, and E de Juana. *Handbook of the Birds of the World Alive*. 2017.  
424 URL: [hbw.com](http://hbw.com).
- 425 [38] J Dorst. “Recherches sur la structure des plumes des trochilidés”. OCLC: 14220401. Paris: Université de Paris, 1951.  
426 260 pp.
- 427 [39] H Dürer. “Schillerfarben der Vogelfeder als Evolutionsproblem”. Medizinischen Fakultät der Universität Basel, 1975.
- 428 [40] W Jetz, GH Thomas, JB Joy, K Hartmann, and AO Mooers. “The Global Diversity of Birds in Space and Time”.  
429 In: *Nature* 491.7424 (2012), pp. 444–448. DOI: 10.1038/nature11631. pmid: 23123857.
- 430 [41] JA McGuire, CC Witt, JVJ Remsen, A Corl, DL Rabosky, et al. “Molecular Phylogenetics and the Diversification of  
431 Hummingbirds”. In: *Current Biology* 24.8 (2014), pp. 910–916. DOI: 10.1016/j.cub.2014.03.016. pmid: 24704078.



- 432 [42] GR Graves and RL Zusi. “An Intergeneric Hybrid Hummingbird (*Heliodoxa Leadbeateri* *Heliangelus Amethysti-*  
433 *collis*) from Northern Colombia”. In: *The Condor* 92.3 (1990), pp. 754–760. DOI: 10.2307/1368695.
- 434 [43] FG Stiles and JO Cortés-Herrera. “Diagnosis and Observations of a Hybrid Hummingbird (*Metallura Tyrianthina* x  
435 *Aglaiocercus Kingi*) in the Eastern Andes of Colombia”. In: *Revista de la Academia Colombiana de Ciencias Exactas,*  
436 *Físicas y Naturales* 39.153 (2015), pp. 481–490. DOI: 10.18257/raccefyn.260.
- 437 [44] SM Doucet and GE Hill. “Do Museum Specimens Accurately Represent Wild Birds? A Case Study of Carotenoid,  
438 Melanin, and Structural Colours in Long-Tailed Manakins *Chiroxiphia Linearis*”. In: *Journal of Avian Biology* 40.2  
439 (2009), pp. 146–156. DOI: 10.1111/j.1600-048X.2009.03763.x.
- 440 [45] CH Graham, JL Parra, C Rahbek, and JA McGuire. “Phylogenetic Structure in Tropical Hummingbird Com-  
441 munities”. In: *Proceedings of the National Academy of Sciences* 106 (Supplement 2 2009), pp. 19673–19678. DOI:  
442 10.1073/pnas.0901649106. pmid: 19805042.
- 443 [46] JL Parra, JA McGuire, and CH Graham. “Incorporating Clade Identity in Analyses of Phylogenetic Community  
444 Structure: An Example with Hummingbirds.” In: *The American Naturalist* 176.5 (2010), pp. 573–587. DOI: 10.  
445 1086/656619. pmid: 20849270.
- 446 [47] RS Ridgely and PJ Greenfield. *The Birds of Ecuador: Status, Distribution and Taxonomy*. Ithaca, NY: Cornell  
447 University Press, 2001. 880 pp. ISBN: 978-0-8014-8720-0.
- 448 [48] MG Meadows, NI Morehouse, RL Rutowski, JM Douglas, and KJ McGraw. “Quantifying Iridescent Coloration in  
449 Animals: A Method for Improving Repeatability”. In: *Behavioral Ecology and Sociobiology* 65.6 (2011), pp. 1317–  
450 1327. DOI: 10.1007/s00265-010-1135-5. pmid: 876.
- 451 [49] DM Chen and TH Goldsmith. “Four Spectral Classes of Cone in the Retinas of Birds”. In: *Journal of Comparative*  
452 *Physiology A* 159.4 (1986), pp. 473–479. DOI: 10.1007/BF00604167.
- 453 [50] TE White, RL Dalrymple, DW Noble, JC O’Hanlon, DB Zurek, et al. “Reproducible Research in the Study of  
454 Biological Coloration”. In: *Animal Behaviour* 106 (2015), pp. 51–57. DOI: 10.1016/j.anbehav.2015.05.007.
- 455 [51] MG Meadows, TE Roudybush, and KJ McGraw. “Dietary Protein Level Affects Iridescent Coloration in Anna’s  
456 Hummingbirds, *Calypte Anna*”. In: *Journal of Experimental Biology* 215.16 (2012), pp. 2742–2750. DOI: 10.1242/  
457 jeb.069351. pmid: 22837446.
- 458 [52] H Gruson, C Andraud, W Daney de Marcillac, S Berthier, M Elias, et al. “Quantitative Characterization of Iridescent  
459 Colours in Biological Studies: A Novel Method Using Optical Theory”. In: *Interface Focus* 9.1 (2019), p. 20180049.  
460 DOI: 10.1098/rsfs.2018.0049.
- 461 [53] R Maia, H Gruson, JA Endler, and TE White. “Pavo 2: New Tools for the Spectral and Spatial Analysis of Colour  
462 in R”. In: *Methods in Ecology and Evolution* 10.7 (2019), pp. 1097–1107. DOI: 10.1111/2041-210X.13174.
- 463 [54] JA Endler and PW Mielke. “Comparing Entire Colour Patterns as Birds See Them”. In: *Biological Journal of the*  
464 *Linnean Society* 86.4 (2005), pp. 405–431. DOI: 10.1111/j.1095-8312.2005.00540.x.

- 465 [55] DC Osorio and M Vorobyev. “A Review of the Evolution of Animal Colour Vision and Visual Communication  
466 Signals”. In: *Vision Research*. Vision Research Reviews 48.20 (2008), pp. 2042–2051. DOI: 10.1016/j.visres.2008.  
467 06.018. pmid: 18627773.
- 468 [56] A Ödeen and O Håstad. “Complex Distribution of Avian Color Vision Systems Revealed by Sequencing the SWS1  
469 Opsin from Total DNA”. In: *Molecular Biology and Evolution* 20.6 (2003), pp. 855–861. DOI: 10.1093/molbev/  
470 msg108. pmid: 12716987.
- 471 [57] G Herrera, JC Zagal, M Diaz, MJ Fernández, A Vielma, et al. “Spectral Sensitivities of Photoreceptors and Their Role  
472 in Colour Discrimination in the Green-Backed Firecrown Hummingbird (*Sephanoides Sephaniodes*)”. In: *Journal of*  
473 *Comparative Physiology A* 194.9 (2008), p. 785. DOI: 10.1007/s00359-008-0349-8. pmid: 18584181.
- 474 [58] A Ödeen and O Håstad. “Pollinating Birds Differ in Spectral Sensitivity”. In: *Journal of Comparative Physiology A*  
475 196.2 (2010), pp. 91–96. DOI: 10.1007/s00359-009-0474-z.
- 476 [59] NS Hart. “Microspectrophotometry of Visual Pigments and Oil Droplets in a Marine Bird, the Wedge-Tailed Shear-  
477 water *Puffinus Pacificus*: Topographic Variations in Photoreceptor Spectral Characteristics”. In: *Journal of Exper-*  
478 *imental Biology* 207.7 (2004), pp. 1229–1240. DOI: 10.1242/jeb.00857. pmid: 14978063.
- 479 [60] DF Stotz, JW Fitzpatrick, TA Parker III, and DK Moskovits. *Neotropical Birds: Ecology and Conservation*. Vol. 3.  
480 OCLC: 32819832. University of Chicago Press, 1996. ISBN: 978-0-226-77629-3.
- 481 [61] MA Stoffel, S Nakagawa, and H Schielzeth. “rptR: Repeatability Estimation and Variance Decomposition by Gener-  
482 alized Linear Mixed-Effects Models”. In: *Methods in Ecology and Evolution* 8.11 (2017). Ed. by S Goslee, pp. 1639–  
483 1644. DOI: 10.1111/2041-210X.12797.
- 484 [62] MC Stoddard and RO Prum. “Evolution of Avian Plumage Color in a Tetrahedral Color Space: A Phylogenetic  
485 Analysis of New World Buntings.” In: *The American Naturalist* 171.6 (2008), pp. 755–776. DOI: 10.1086/587526.
- 486 [63] M Pagel and F Lutzoni. “Accounting for Phylogenetic Uncertainty in Comparative Studies of Evolution and Adap-  
487 tation”. In: *Biological Evolution and Statistical Physics*. Ed. by M Lässig and A Valleriani. Vol. 585. Lecture Notes  
488 in Physics. Berlin, Heidelberg: Springer Berlin Heidelberg, 2002. ISBN: 978-3-540-43188-6. DOI: 10.1007/3-540-  
489 45692-9.
- 490 [64] OJ Hardy and B Senterre. “Characterizing the Phylogenetic Structure of Communities by an Additive Partitioning of  
491 Phylogenetic Diversity”. In: *Journal of Ecology* 95.3 (2007), pp. 493–506. DOI: 10.1111/j.1365-2745.2007.01222.x.
- 492 [65] C Baraloto, OJ Hardy, CET Paine, KG Dexter, C Cruaud, et al. “Using Functional Traits and Phylogenetic Trees  
493 to Examine the Assembly of Tropical Tree Communities”. In: *Journal of Ecology* 100.3 (2012), pp. 690–701. DOI:  
494 10.1111/j.1365-2745.2012.01966.x.
- 495 [66] OJ Hardy. “Testing the Spatial Phylogenetic Structure of Local Communities: Statistical Performances of Different  
496 Null Models and Test Statistics on a Locally Neutral Community”. In: *Journal of Ecology* 96.5 (2008), pp. 914–926.  
497 DOI: 10.1111/j.1365-2745.2008.01421.x.

- 498 [67] F de Bello, P Šmilauer, JAF Diniz-Filho, CP Carmona, Z Lososová, et al. “Decoupling Phylogenetic and Functional  
499 Diversity to Reveal Hidden Signals in Community Assembly”. In: *Methods in Ecology and Evolution* 8.10 (2017),  
500 pp. 1200–1211. DOI: 10.1111/2041-210X.12735.
- 501 [68] VN Balasubramanian, S Chakraborty, and S Panchanathan. “Conformal Predictions for Information Fusion”. In:  
502 *Annals of Mathematics and Artificial Intelligence* 74.1-2 (2015), pp. 45–65. DOI: 10.1007/s10472-013-9392-4.
- 503 [69] RK Suarez. “Hummingbird Flight: Sustaining the Highest Mass-Specific Metabolic Rates among Vertebrates”. In:  
504 *Experientia* 48.6 (1992), pp. 565–570. DOI: 10.1007/BF01920240.
- 505 [70] DL Altshuler, R Dudley, and JA McGuire. “Resolution of a Paradox: Hummingbird Flight at High Elevation Does  
506 Not Come without a Cost”. In: *Proceedings of the National Academy of Sciences* 101.51 (2004), pp. 17731–17736.  
507 DOI: 10.1073/pnas.0405260101. pmid: 15598748.
- 508 [71] DL Altshuler, FG Stiles, and R Dudley. “Of Hummingbirds and Helicopters: Hovering Costs, Competitive Ability,  
509 and Foraging Strategies.” In: *The American Naturalist* 163.1 (2004), pp. 16–25. DOI: 10.1086/380511. pmid:  
510 14767833.
- 511 [72] AB Lindberg and JM Olesen. “The Fragility of Extreme Specialization: *Passiflora Mixta* and Its Pollinating Hum-  
512 mingbird *Ensifera Ensifera*”. In: *Journal of Tropical Ecology* 17.2 (2001), pp. 323–329. DOI: 10.1017/S0266467401001213.
- 513 [73] RP Moore, WD Robinson, IJ Lovette, and TR Robinson. “Experimental Evidence for Extreme Dispersal Limitation  
514 in Tropical Forest Birds”. In: *Ecology Letters* 11.9 (2008), pp. 960–968. DOI: 10.1111/j.1461-0248.2008.01196.x.
- 515 [74] LN Céspedes, LI Pavan, JA Hazlehurst, and JE Jankowski. “The Behavior and Diet of the Shining Sunbeam (*Aglae-  
516 actis Cupripennis*): A Territorial High-Elevation Hummingbird”. In: *The Wilson Journal of Ornithology* 131.1 (2019),  
517 pp. 24–34. DOI: 10.1676/18-79.
- 518 [75] RK Simpson and KJ McGraw. “It’s Not Just What You Have, but How You Use It: Solar-Positional and Behavioural  
519 Effects on Hummingbird Colour Appearance during Courtship”. In: *Ecology Letters* 0.0 (2018). DOI: 10.1111/ele.  
520 13125.
- 521 [76] JA Tobias, R Planqué, DL Cram, and N Seddon. “Species Interactions and the Structure of Complex Communication  
522 Networks”. In: *Proceedings of the National Academy of Sciences* 111.3 (2014), pp. 1020–1025. DOI: 10.1073/pnas.  
523 1314337111. pmid: 24395769.
- 524 [77] MK McNaught and IPF Owens. “Interspecific Variation in Plumage Colour among Birds: Species Recognition  
525 or Light Environment?” In: *Journal of Evolutionary Biology* 15.4 (2002), pp. 505–514. DOI: 10.1046/j.1420-  
526 9101.2002.00431.x.
- 527 [78] H Gruson, M Elias, C Andraud, C Djediat, S Berthier, et al. “Hummingbird Iridescence: An Unsuspected Structural  
528 Diversity Influences Colouration at Multiple Scales”. In: *bioRxiv* (2019), p. 699744. DOI: 10.1101/699744.
- 529 [79] CJ Clark, TJ Feo, and I Escalante. “Courtship Displays and Natural History of Scintillant (*Selasphorus Scintilla*)  
530 and Volcano (*S. Flammula*) Hummingbirds”. In: *The Wilson Journal of Ornithology* 123.2 (2011), pp. 218–228. DOI:  
531 10.1676/10-076.1.

- 532 [80] CM Eliason, MD Shawkey, and JA Clarke. “Evolutionary Shifts in the Melanin-Based Color System of Birds”. In:  
533 *Evolution* 70.2 (2016), pp. 445–454. DOI: 10.1111/evo.12855. pmid: 26044706.
- 534 [81] P Matyjasiak. “Birds Associate Species-Specific Acoustic and Visual Cues: Recognition of Heterospecific Rivals by  
535 Male Blackcaps”. In: *Behavioral Ecology* 16.2 (2005), pp. 467–471. DOI: 10.1093/beheco/ari012.
- 536 [82] D Luther. “The Influence of the Acoustic Community on Songs of Birds in a Neotropical Rain Forest”. In: *Behavioral*  
537 *Ecology* 20.4 (2009), pp. 864–871. DOI: 10.1093/beheco/arp074.
- 538 [83] CJ Clark and TJ Feo. “The Anna’s Hummingbird Chirps with Its Tail: A New Mechanism of Sonation in Birds”.  
539 In: *Proceedings of the Royal Society of London B: Biological Sciences* 275.1637 (2008), pp. 955–962. DOI: 10.1098/  
540 rspb.2007.1619. pmid: 18230592.
- 541 [84] CJ Clark, DO Elias, and RO Prum. “Aeroelastic Flutter Produces Hummingbird Feather Songs”. In: *Science* 333.6048  
542 (2011), pp. 1430–1433. DOI: 10.1126/science.1205222. pmid: 21903810.
- 543 [85] CJ Clark. “Wing, Tail, and Vocal Contributions to the Complex Acoustic Signals of Courting Calliope Humming-  
544 birds”. In: *Current Zoology* 57.2 (2011), pp. 187–196. DOI: 10.1093/czoolo/57.2.187.
- 545 [86] FG Stiles and LL Wolf. “Ecology and Evolution of Lek Mating Behavior in the Long-Tailed Hermit Hummingbird”.  
546 In: *Ornithological Monographs* 27 (1979), pp. iii–78. DOI: 10.2307/40166760. JSTOR: 40166760.
- 547 [87] MA Pizo. “Lek Behavior of the Plovercrest (*Stephanoxis Lalandi*, Trochilidae)”. In: *The Wilson Journal of Ornithol-*  
548 *ogy* 124.1 (2012), pp. 106–112. DOI: 10.1676/11-055.1.
- 549 [88] TA Hurly, RD Scott, and SD Healy. “The Function of Displays of Male Rufous Hummingbirds”. In: *The Condor*  
550 103.3 (2001), pp. 647–651. DOI: 10.1650/0010-5422(2001)103[0647:TFODOM]2.0.CO;2.
- 551 [89] S Nakagawa and H Schielzeth. “Repeatability for Gaussian and Non-Gaussian Data: A Practical Guide for Biologists”.  
552 In: *Biological Reviews* 85.4 (2010), pp. 935–956. DOI: 10.1111/j.1469-185X.2010.00141.x. pmid: 20569253.

Table 3: List of species with their provenance (Confluences = Musée des Confluences, Lyon, France, MNHN = Muséum National d’Histoire Naturelle, Paris, France) and strata. Strata data were extracted from Stotz et al. [60] and used in vision models.

| Species                               | Clade     | Provenance  | Strata     |
|---------------------------------------|-----------|-------------|------------|
| <i>Adelomyia melanogenys</i>          | Coquette  | Confluences | Understory |
| <i>Aglaeactis cupripennis</i>         | Brilliant | MNHN        | Canopy     |
| <i>Aglaiocercus coelestis</i>         | Coquette  | MNHN        | Canopy     |
| <i>Aglaiocercus kingi mocoa</i>       | Coquette  | MNHN        | Canopy     |
| <i>Amazilia amabilis</i>              | Emerald   | MNHN        | Understory |
| <i>Amazilia amazilia</i>              | Emerald   | MNHN        | Understory |
| <i>Amazilia fimbriata fluviatilis</i> | Emerald   | MNHN        | Canopy     |
| <i>Amazilia franciae</i>              | Emerald   | MNHN        | Canopy     |

| Species                                      | Clade     | Provenance  | Strata     |
|----------------------------------------------|-----------|-------------|------------|
| <i>Amazilia grayi meridionalis</i>           | Emerald   | MNHN        | Canopy     |
| <i>Amazilia rosenbergi</i>                   | Emerald   | MNHN        | Understory |
| <i>Amazilia sapphirina</i>                   | Emerald   | MNHN        | Canopy     |
| <i>Amazilia tzacatl jucunda</i>              | Emerald   | MNHN        | Canopy     |
| <i>Androdon aequatorialis</i>                | Mangoe    | MNHN        | Understory |
| <i>Anthracothorax nigricollis</i>            | Mangoe    | MNHN        | Canopy     |
| <i>Avocettula recurvirostris</i>             | Mangoe    | Confluences | Understory |
| <i>Boissonneaua flavescens</i>               | Brilliant | MNHN        | Canopy     |
| <i>Boissonneaua matthewsii</i>               | Brilliant | MNHN        | Canopy     |
| <i>Calliphlox amethystina</i>                | Bee       | MNHN        | Canopy     |
| <i>Calliphlox mitchellii</i>                 | Bee       | Confluences | Canopy     |
| <i>Campylopterus falcatus</i>                | Emerald   | MNHN        | Understory |
| <i>Campylopterus largipennis</i>             | Emerald   | MNHN        | Understory |
| <i>Campylopterus villaviscensio</i>          | Emerald   | MNHN        | Understory |
| <i>Chaetocercus bombus</i>                   | Bee       | MNHN        | Canopy     |
| <i>Chaetocercus mulsant</i>                  | Bee       | MNHN        | Understory |
| <i>Chalcostigma herrani</i>                  | Coquette  | MNHN        | Canopy     |
| <i>Chalcostigma ruficeps</i>                 | Coquette  | Confluences | Understory |
| <i>Chalcostigma stanleyi stanleyi</i>        | Coquette  | MNHN        | Canopy     |
| <i>Chalybura buffonii intermedia</i>         | Emerald   | Confluences | Understory |
| <i>Chalybura urochrysia urochrysia</i>       | Emerald   | Confluences | Understory |
| <i>Chlorestes notata obsoletus-puruensis</i> | Emerald   | Confluences | Canopy     |
| <i>Chlorostilbon melanorhynchus</i>          | Emerald   | MNHN        | Understory |
| <i>Chlorostilbon mellisugus phoeopygus</i>   | Emerald   | Confluences | Understory |
| <i>Chrysuronia oenone</i>                    | Emerald   | MNHN        | Canopy     |
| <i>Coeligena coeligena</i>                   | Brilliant | MNHN        | Understory |
| <i>Coeligena iris hesperus</i>               | Brilliant | MNHN        | Understory |
| <i>Coeligena iris iris</i>                   | Brilliant | MNHN        | Understory |
| <i>Coeligena lutetiae</i>                    | Brilliant | MNHN        | Understory |
| <i>Coeligena torquata fulgidigula</i>        | Brilliant | MNHN        | Understory |
| <i>Coeligena torquata torquata</i>           | Brilliant | MNHN        | Understory |
| <i>Coeligena wilsoni</i>                     | Brilliant | MNHN        | Understory |
| <i>Colibri coruscans</i>                     | Mangoe    | MNHN        | Canopy     |
| <i>Colibri delphinae</i>                     | Mangoe    | MNHN        | Canopy     |

| Species                                       | Clade     | Provenance  | Strata     |
|-----------------------------------------------|-----------|-------------|------------|
| <i>Colibri thalassinus</i>                    | Mangoe    | MNHN        | Canopy     |
| <i>Damophila julie</i>                        | Emerald   | MNHN        | Understory |
| <i>Discosura conversii</i>                    | Coquette  | MNHN        | Canopy     |
| <i>Discosura langsdorffi</i>                  | Coquette  | Confluences | Canopy     |
| <i>Discosura popelairii</i>                   | Coquette  | MNHN        | Canopy     |
| <i>Doryfera johannae</i>                      | Mangoe    | MNHN        | Understory |
| <i>Doryfera ludovicae</i>                     | Mangoe    | MNHN        | Understory |
| <i>Ensifera ensifera</i>                      | Brilliant | MNHN        | Understory |
| <i>Eriocnemis alinae</i>                      | Brilliant | MNHN        | Understory |
| <i>Eriocnemis luciani</i>                     | Brilliant | MNHN        | Understory |
| <i>Eriocnemis mosquera</i>                    | Brilliant | Confluences | Understory |
| <i>Eriocnemis nigrivestis</i>                 | Brilliant | MNHN        | Understory |
| <i>Eriocnemis vestita smaragdinicollis</i>    | Brilliant | MNHN        | Understory |
| <i>Eutoxeres aquila</i>                       | Hermit    | MNHN        | Understory |
| <i>Eutoxeres condamini</i>                    | Hermit    | Confluences | Understory |
| <i>Florisuga mellivora</i>                    | Topazes   | MNHN        | Canopy     |
| <i>Glaucis aeneus</i>                         | Hermit    | MNHN        | Understory |
| <i>Glaucis hirsutus affinis</i>               | Hermit    | MNHN        | Understory |
| <i>Haplophaedia aureliae russata</i>          | Brilliant | Confluences | Understory |
| <i>Haplophaedia lugens</i>                    | Brilliant | Confluences | Understory |
| <i>Heliangelus amethysticollis laticlavus</i> | Coquette  | Confluences | Understory |
| <i>Heliangelus exortis</i>                    | Coquette  | MNHN        | Understory |
| <i>Heliangelus exortis</i>                    | Coquette  | MNHN        | Understory |
| <i>Heliangelus micraster</i>                  | Coquette  | MNHN        | Understory |
| <i>Heliangelus strophianus</i>                | Coquette  | MNHN        | Understory |
| <i>Heliangelus viola</i>                      | Coquette  | MNHN        | Understory |
| <i>Heliodoxa aurescens</i>                    | Brilliant | MNHN        | Understory |
| <i>Heliodoxa imperatrix</i>                   | Brilliant | MNHN        | Understory |
| <i>Heliodoxa jacula jamesoni</i>              | Brilliant | MNHN        | Understory |
| <i>Heliodoxa leadbeateri</i>                  | Brilliant | MNHN        | Understory |
| <i>Heliodoxa rubinoides aequatorialis</i>     | Brilliant | MNHN        | Understory |
| <i>Heliodoxa schreibersii</i>                 | Brilliant | MNHN        | Understory |
| <i>Heliomaster longirostris</i>               | MtGem     | MNHN        | Canopy     |
| <i>Heliothryx auritus</i>                     | Mangoe    | MNHN        | Canopy     |

| Species                                      | Clade     | Provenance  | Strata     |
|----------------------------------------------|-----------|-------------|------------|
| <i>Heliothryx barroti</i>                    | Mangoe    | MNHN        | Canopy     |
| <i>Klais guimeti</i>                         | Emerald   | MNHN        | Understory |
| <i>Lafresnaya lafresnayi gayi</i>            | Brilliant | Confluences | Understory |
| <i>Lesbia nuna gracilis</i>                  | Coquette  | MNHN        | Canopy     |
| <i>Leucippus baeri</i>                       | Emerald   | Confluences | Understory |
| <i>Leucippus chlorocercus</i>                | Emerald   | Confluences | Canopy     |
| <i>Lophornis chalybeus verreauxi</i>         | Coquette  | MNHN        | Canopy     |
| <i>Metallura baroni</i>                      | Coquette  | MNHN        | Canopy     |
| <i>Metallura tyrianthina tyrianthina</i>     | Coquette  | MNHN        | Understory |
| <i>Metallura williami primolina</i>          | Coquette  | MNHN        | Canopy     |
| <i>Myrmia micrura</i>                        | Bee       | MNHN        | Canopy     |
| <i>Ocreatus underwoodii melanantherus</i>    | Brilliant | MNHN        | Understory |
| <i>Opisthoprora euryptera</i>                | Coquette  | Confluences | Understory |
| <i>Oreotrochilus chimborazo chimborazo</i>   | Coquette  | MNHN        | Understory |
| <i>Oreotrochilus chimborazo jamesonii</i>    | Coquette  | MNHN        | Understory |
| <i>Patagona gigas</i>                        | Patagona  | MNHN        | Canopy     |
| <i>Phaethornis atrimentalis atrimentalis</i> | Hermit    | Confluences | Understory |
| <i>Phaethornis bourcierii</i>                | Hermit    | MNHN        | Understory |
| <i>Phaethornis griseogularis</i>             | Hermit    | MNHN        | Understory |
| <i>Phaethornis griseogularis</i>             | Hermit    | MNHN        | Understory |
| <i>Phaethornis guy</i>                       | Hermit    | MNHN        | Understory |
| <i>Phaethornis hispidus</i>                  | Hermit    | Confluences | Understory |
| <i>Phaethornis longirostris</i>              | Hermit    | Confluences | Understory |
| <i>Phaethornis malaris</i>                   | Hermit    | Confluences | Understory |
| <i>Phaethornis ruber</i>                     | Hermit    | Confluences | Understory |
| <i>Phaethornis syrmatophorus columbianus</i> | Hermit    | MNHN        | Understory |
| <i>Phaethornis yaruqui yaruqui</i>           | Hermit    | MNHN        | Understory |
| <i>Phlogophilus hemileucurus</i>             | Coquette  | MNHN        | Understory |
| <i>Polytmus theresiae leucorrhous</i>        | Mangoe    | MNHN        | Understory |
| <i>Pterophanes cyanopterus</i>               | Brilliant | MNHN        | Understory |
| <i>Ramphomicron microrhynchum</i>            | Coquette  | MNHN        | Canopy     |
| <i>Schistes geoffroyi</i>                    | Mangoe    | MNHN        | Understory |
| <i>Taphrospilus hypostictus</i>              | Emerald   | MNHN        | Understory |
| <i>Thalurania fannyi verticeps</i>           | Emerald   | MNHN        | Understory |

| Species                                | Clade     | Provenance  | Strata     |
|----------------------------------------|-----------|-------------|------------|
| <i>Thalurania furcata viridipectus</i> | Emerald   | MNHN        | Understory |
| <i>Thaumastura cora</i>                | Bee       | Confluences | Canopy     |
| <i>Threnetes leucurus cervinicauda</i> | Hermit    | Confluences | Understory |
| <i>Threnetes ruckeri</i>               | Hermit    | MNHN        | Understory |
| <i>Urochroa bougueri</i>               | Brilliant | Confluences | Understory |
| <i>Urochroa bougueri leucura</i>       | Brilliant | Confluences | Understory |
| <i>Urosticte benjamini</i>             | Brilliant | MNHN        | Understory |
| <i>Urosticte ruficrissa</i>            | Brilliant | Confluences | Understory |



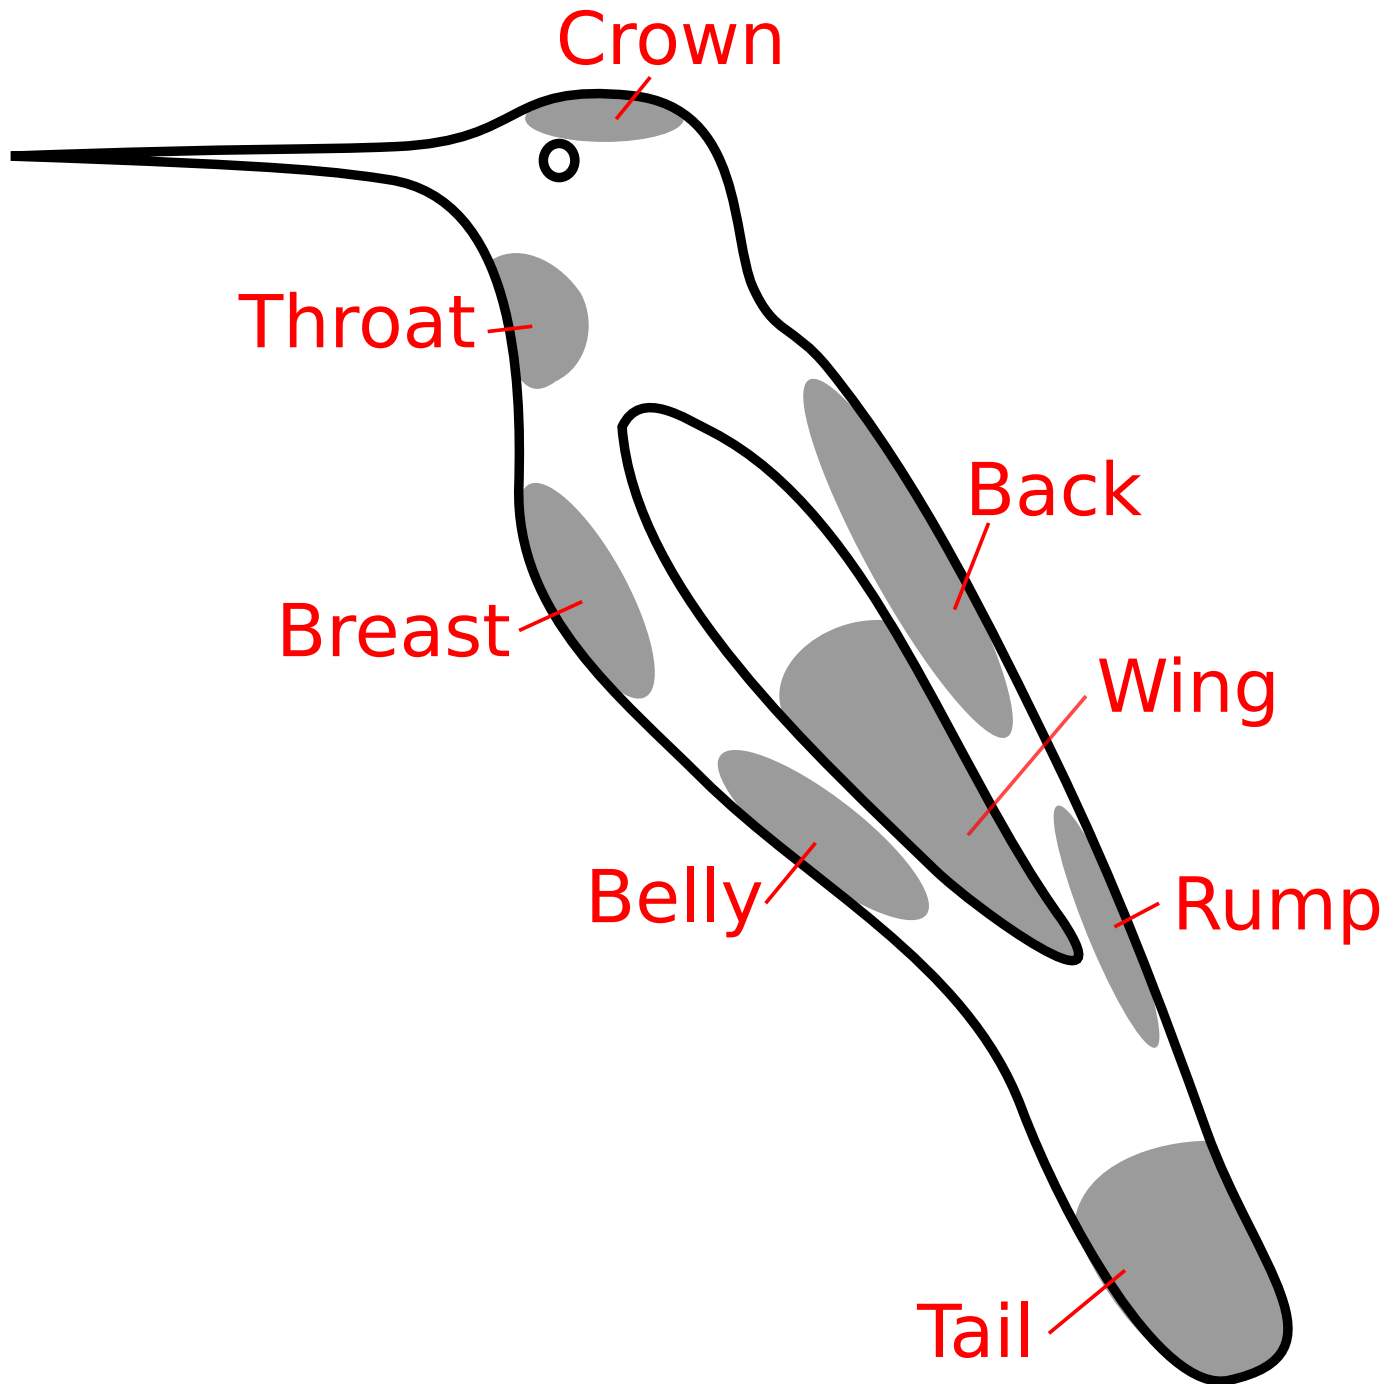

Supplementary figure 1: Locations and names of the 8 patches measured on all species. Additional patches were measured for each species as soon as they differed from one of the 8 patches listed here for a human observer, as detailed in the methods section and as in Gomez and Théry [7].

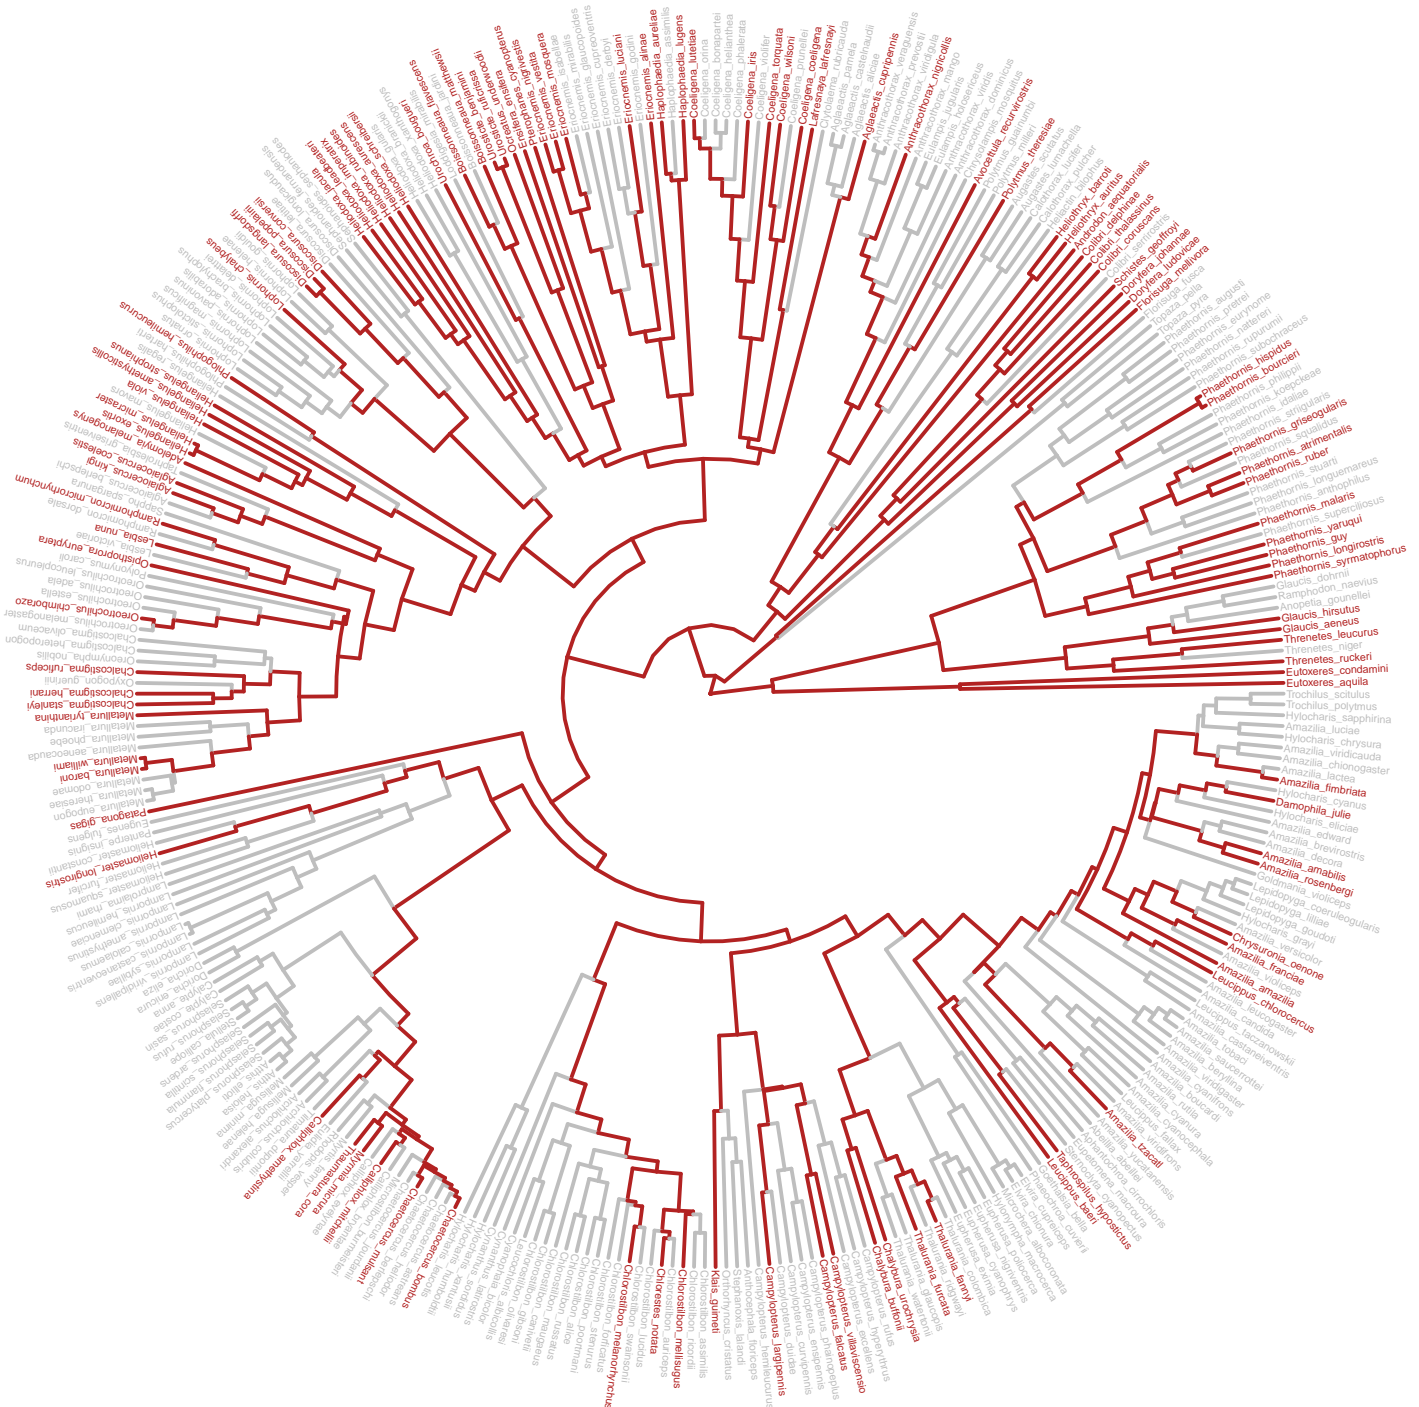

Supplementary figure 2: Phylogenetic coverage of the *Trochilidae* family in our dataset (species and lineages in red).

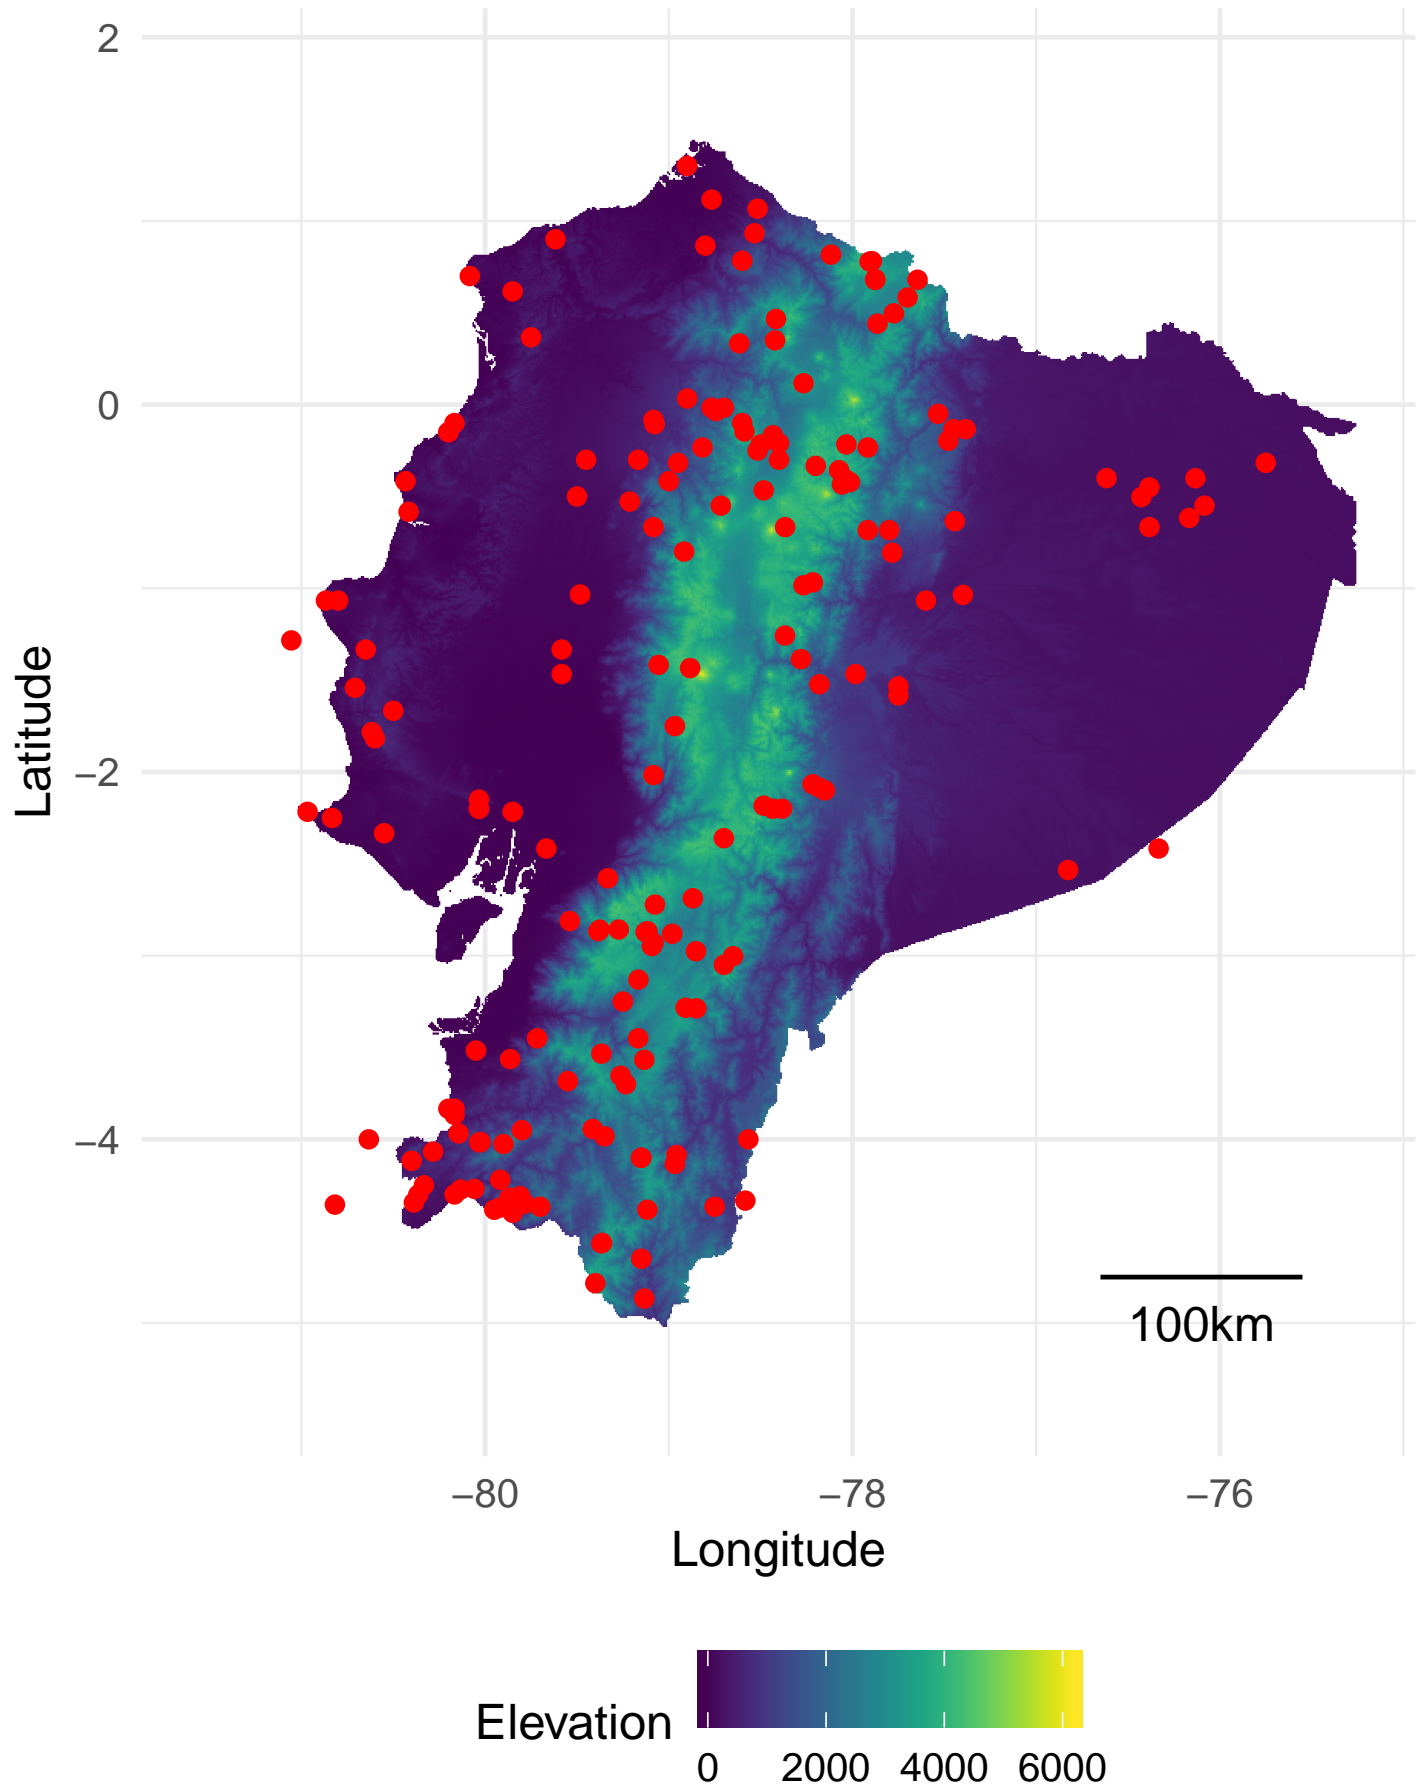

Supplementary figure 3: Study sites locations (red dots) plotted on an altitudinal map of Ecuador. Communities outside the borders of the map are on islands or close enough to Ecuador borders to be taken into account in our study.

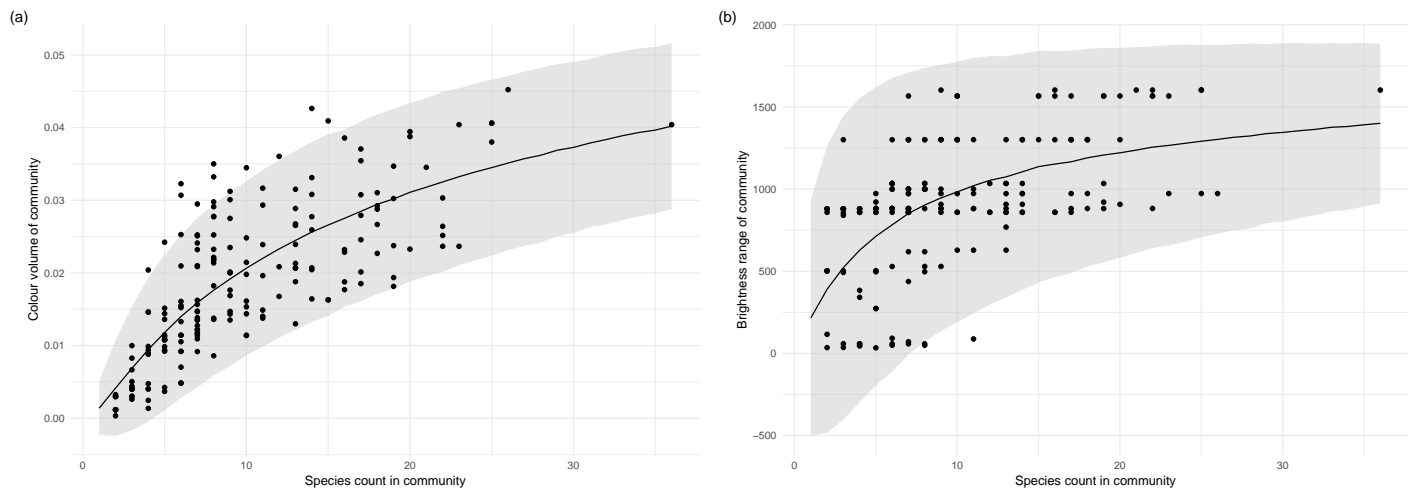

Figure 1: (a) community total colour volume and (b) brightness range increase with the number of species within the community. Each point is a community. The black solid line represents the mean value of (a) colour volume or (b) brightness range from 10 000 random communities with a given species count (null model) and the gray ribbon represents two standard deviations from the mean of the null model.

| Variable   | Diffuse |         | Directional |         | Both  |         |
|------------|---------|---------|-------------|---------|-------|---------|
|            | R       | p-value | R           | p-value | R     | p-value |
| x          | 0.734   | 0.002   | 0.877       | <0.0001 | 0.925 | <0.0001 |
| Hue y      | 0.923   | <0.0001 | 0.785       | 0.0006  | 0.951 | <0.0001 |
| z          | 0.780   | 0.0006  | 0.880       | <0.0001 | 0.940 | <0.0001 |
| Brightness | 0.411   | 0.090   | 0.055       | 0.48    | 0.373 | 0.04    |

Supplementary table 1: We quantified the repeatability R (intra-class coefficient ICC) and the related p-value by bootstrapping using the `rptR` R package [89] of indices used in this study by performing the same measurements twice on two patches for 12 species (*Coeligena torquata*, *Colibri coruscans*, *Doryfera ludovicae*, *Heliangelus strophianus*, *Heliodoxa jamesonii*, *Heliostyris barroti*, *Juliamyia julie*, *Lesbia nuna*, *Metallura tyrianthina*, *Ramphomicron microrhynchum*, *Schistes albogularis*, *Urosticte benjamini*). Patches were selected to be of similar hue from a human point of view.

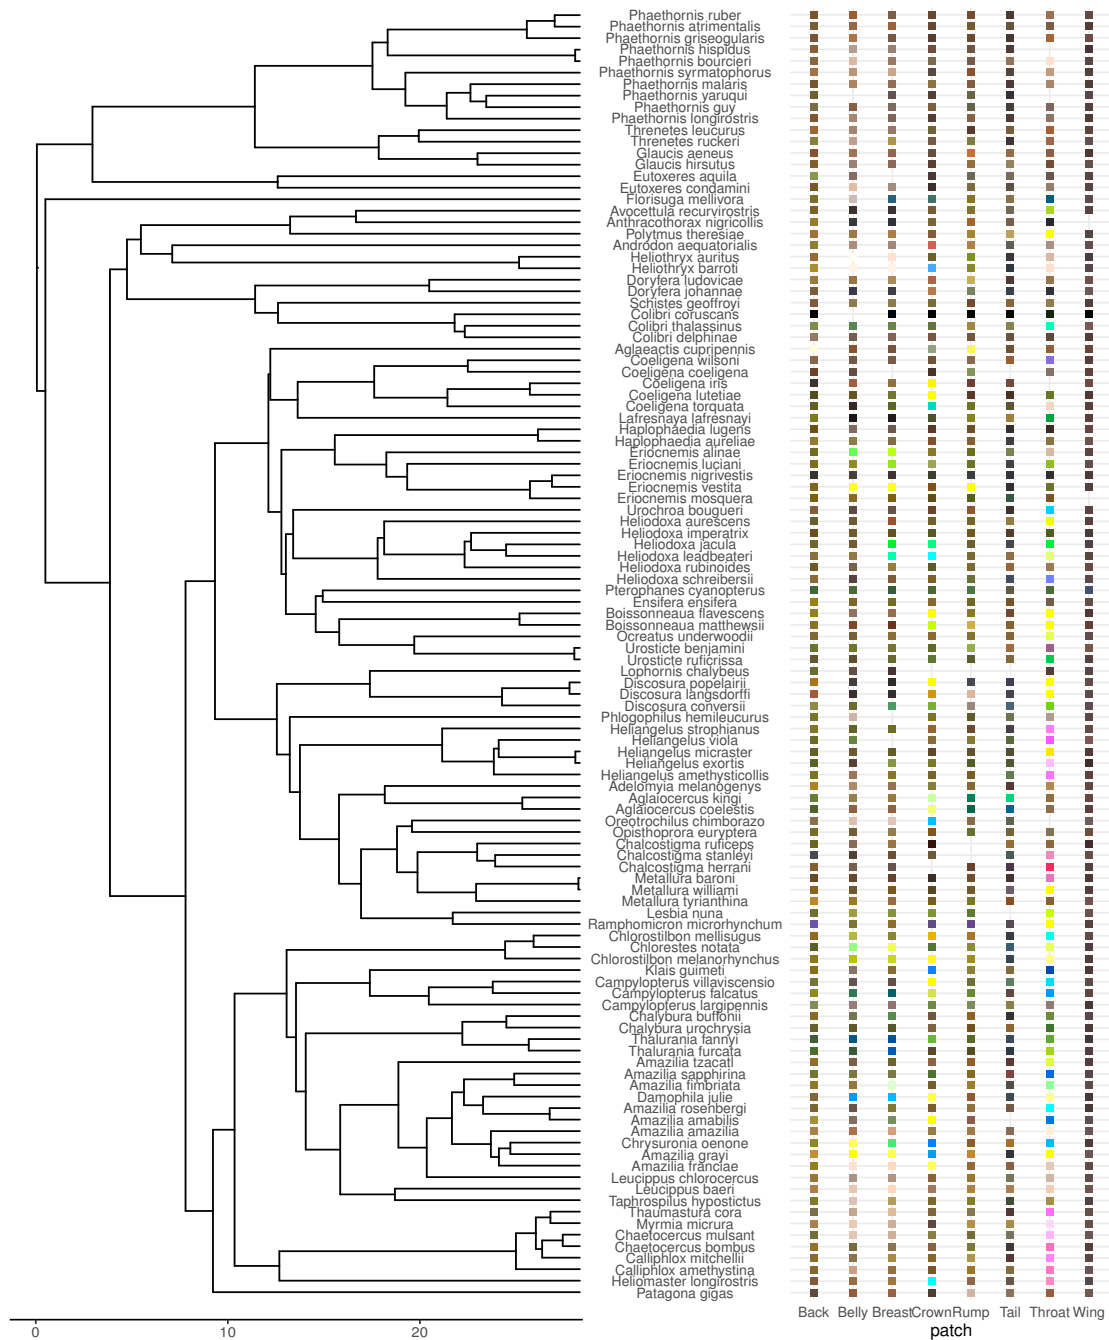

Supplementary figure 4: Colour of the 8 main patches for each species in our dataset. The colour corresponds to the colour in the human visual system (CIE10). The x-axis on the phylogeny is in millions years.

| variable   | value             | Crown             | Back              | Rump         | Tail        | Throat            | Breast            | Belly             | Wing         |
|------------|-------------------|-------------------|-------------------|--------------|-------------|-------------------|-------------------|-------------------|--------------|
| Hue        | $\tau_{st}$       | -0.0073           | 0.055             | 0.055        | 0.044       | 0.027             | 0.03              | 0.05              | 0.058        |
|            | $p_{\tau_{st}<0}$ | 0.4               | 1                 | 1            | 1           | 0.9               | 0.9               | 1                 | 1            |
|            | $p_{\tau_{st}>0}$ | 0.6               | <b>0.01</b>       | <b>0.01</b>  | <b>0.03</b> | 0.09              | 0.06              | <b>0.005</b>      | <b>0.006</b> |
|            | $d\tau_{st}$      | 0.0099            | 0.026             | -0.0021      | 0.0034      | -0.0021           | -0.0032           | -0.01             | 0.00073      |
|            | $p_{\tau_{st}<0}$ | 1                 | 1                 | 0.8          | 1           | 0.9               | 0.3               | <b>&lt;0.0001</b> | 1            |
|            | $p_{\tau_{st}>0}$ | <b>&lt;0.0001</b> | <b>&lt;0.0001</b> | 1            | 0.2         | 1                 | 1                 | 1                 | 1            |
| Brightness | $\tau_{st}$       | -0.021            | 0.0078            | 0.0032       | -0.0064     | 0.00015           | 0.0041            | -0.0031           | 0.0091       |
|            | $p_{\tau_{st}<0}$ | 0.1               | 0.7               | 0.6          | 0.5         | 0.5               | 0.6               | 0.5               | 0.6          |
|            | $p_{\tau_{st}>0}$ | 0.9               | 0.3               | 0.4          | 0.5         | 0.5               | 0.4               | 0.5               | 0.4          |
|            | $d\tau_{st}$      | -0.0014           | 0.0028            | 0.00037      | 0.00068     | 0.013             | 0.023             | 0.007             | -0.0058      |
|            | $p_{\tau_{st}<0}$ | 0.3               | 1                 | 0.9          | 1           | 1                 | 1                 | 1                 | 0.2          |
|            | $p_{\tau_{st}>0}$ | 0.8               | 0.7               | 0.7          | 0.8         | <b>&lt;0.0001</b> | <b>&lt;0.0001</b> | <b>0.002</b>      | 1            |
| Hue shift  | $\tau_{st}$       | -0.007            | 0.051             | 0.052        | 0.043       | 0.027             | 0.029             | 0.049             | 0.058        |
|            | $p_{\tau_{st}<0}$ | 0.4               | 1                 | 1            | 1           | 0.9               | 0.9               | 1                 | 1            |
|            | $p_{\tau_{st}>0}$ | 0.6               | <b>0.01</b>       | <b>0.01</b>  | <b>0.03</b> | 0.08              | 0.06              | <b>0.006</b>      | <b>0.006</b> |
|            | $d\tau_{st}$      | 0.0087            | 0.0059            | -0.0068      | -0.006      | -0.0033           | 0.0023            | -0.0098           | -0.0018      |
|            | $p_{\tau_{st}<0}$ | 1                 | 1                 | <b>0.005</b> | <b>0.01</b> | 0.6               | 1                 | <b>&lt;0.0001</b> | 1            |
|            | $p_{\tau_{st}>0}$ | <b>&lt;0.0001</b> | <b>0.03</b>       | 1            | 1           | 1                 | 0.9               | 1                 | 1            |

Supplementary table 2: Numerical values for  $\tau_{st}$  and decoupled  $\tau_{st}$  (denoted  $d\tau_{st}$ ). P-values were computed by comparison of the actual value with the null distribution (obtained by randomisation of the communities using method 1s of Hardy [66]). Significant p-values are in bold and green. Positive values of  $d\tau_{st}$  indicate phenotypic clustering whereas negative values indicate overdispersion.
